1 **Title:** The prevalence and risk factors for phantom limb pain in people with amputations: a  
2 systematic review and meta-analysis.

3 **Short title:** Prevalence of phantom limb pain in amputees.

4 **Authors:** K. Limakatso<sup>1</sup>, G. J. Bedwell<sup>1,2</sup>, V. J. Madden<sup>1,3</sup>, R. Parker<sup>1,2</sup>

5 <sup>1</sup>Pain Management Unit, Department of Anaesthesia and Perioperative Medicine, University of Cape  
6 Town, Cape Town, South Africa.

7 <sup>2</sup>Division of Physiotherapy, Department of Health and Rehabilitation Sciences, University of Cape  
8 Town, Cape Town, South Africa.

9 <sup>3</sup>Neuroscience Institute. University of Cape Town, Groote Schuur Hospital, Cape Town, South Africa.

10 Corresponding author: Romy Parker (PhD), Pain management unit, Department of Anaesthesia and  
11 Perioperative Medicine, D23 Groote Schuur Hospital, Faculty of Health Sciences, Anzio Rd,  
12 Observatory, 1925. [romy.parker@uct.ac.za](mailto:romy.parker@uct.ac.za). (+27-21-6501608)

## 13 Background

14 Phantom limb pain (PLP) is commonly defined as pain felt in the missing portion of an amputated  
15 limb (Ehde, Czerniecki et al. 2000). Some cases of PLP have been reported in people with congenital  
16 amputations (Garcia, Flores et al. 2018). However, PLP commonly occurs in people with limb  
17 amputations due to trauma or surgery (Neil 2015). It has been proposed that risk factors such as  
18 persisting pre-operative pain, diabetic cause of amputation and prosthesis use contribute to the  
19 onset of PLP (Dijkstra, Geertzen et al. 2002). Phantom limb pain is common and often associated  
20 with negative consequences such as depression and problems with prosthesis use, sleep and  
21 participation in activities of daily function (Morgan, Friedly et al. 2017).

22 The prevalence of PLP among people with amputations is unclear, perhaps because of conflicting  
23 reports across the literature. While one study reported a high prevalence of 85.6% (Clark, Bowling et  
24 al. 2013), another reported a markedly lower prevalence of 0% (Kooijman, Dijkstra et al. 2000). The  
25 conflicting reports in the literature regarding the prevalence of PLP are perplexing, but may be due  
26 to variations in the time period during which the studies were undertaken, the countries in which  
27 the studies were conducted, and the recruitment processes used during collection of  
28 epidemiological data (Maimela, Alberts et al. 2016).

29 Low prevalence rates were reported by early studies conducted during a period when PLP was  
30 commonly characterised as a psychiatric disorder (Jensen, Krebs et al. 1985). The low prevalence  
31 rates could be explained by patients' fear of reporting their pain to avoid the stigma associated with  
32 PLP (Weeks, Anderson-Barnes et al. 2010). Low prevalence rates were also recorded in studies  
33 conducted in developing countries where stigma associated with chronic pain conditions is common,  
34 and effective strategies to follow up patients after amputations are still lacking (Mishra, Bhatnagar  
35 et al. 2008, Gosselin, Gyamfi et al. 2011). Furthermore, many prevalence studies of PLP were  
36 conducted in clinical settings using patients continuing with medical care, introducing a selection  
37 bias (Sherman, Sherman et al. 1980, Desmond and MacLachlan 2010, Ventham, Heyburn et al. 2010,

38 Byrne 2011, Ahmed, Bhatnagar et al. 2017). Therefore, patients without continuing clinical care may  
39 be unaccounted for in these statistics.

40 Prevalence studies are key to informing researchers, clinicians, policy-makers and the public about  
41 the burden of diseases in society (Moloi, Watkins et al. 2016). However, the burden of PLP is unclear  
42 because of a wide variation in the reported prevalence estimates. To our knowledge, no systematic  
43 review has synthesised data on the prevalence and risk factors for PLP. To address this gap in the  
44 literature, we conducted a systematic review and meta-analysis by gathering and critically appraising  
45 relevant literature regarding the prevalence and associated risk factors for PLP in people with  
46 amputations.

## 47 Objective

48 The primary aim of this systematic review was to estimate the prevalence of PLP in people with  
49 amputations. The secondary aim was to determine whether there is a difference in the prevalence of  
50 PLP in developed and developing countries as per the World Economic Situation and Prospects  
51 classification system (WESP 2018). The exploratory aim was to identify associated risk factors for PLP  
52 in people with limb amputations.

## 53 **MATERIAL AND METHODS**

54 This systematic review was developed in accordance with the Preferred Reporting Items of  
55 Systematic Reviews and Meta-Analysis (PRISMA) guidelines (Moher, Shamseer et al. 2015). The  
56 review protocol was registered on PROSPERO - an international prospective register of systematic  
57 reviews with health-related outcome, and published in Systematic Reviews (Limakatso, Bedwell et  
58 al. 2019). The PRISMA criteria fulfilled by this systematic review are presented in [additional file 1](#).

### 59 Data sources and search procedure

60 The lead investigator (KL) and a senior librarian (MS) developed a comprehensive search strategy  
61 ([Appendix A](#)) using five Medical Subject Headings (MeSH): prevalence, risk factors, amputation,

62 phantom limb and epidemiology. Articles published between 1980 and July 2019 were identified  
63 through a systematic search of the following electronic databases: MEDLINE/PubMed (via  
64 EBSCOhost), PsycINFO (via EBSCOhost), PsycArticles, Cumulative Index to Nursing and Allied Health  
65 Literature (CINAHL) (via EBSCOhost), Africa-Wide Information (via EBSCOhost), Health Source:  
66 Nursing/Academic Edition (via EBSCOhost), SCOPUS, Web of Science and Academic Search Premier  
67 (via EBSCOhost). Grey literature was searched on bioRxiv ([www.biorxiv.org](http://www.biorxiv.org)), Preprints  
68 ([www.preprints.org](http://www.preprints.org)), Open Science Framework ([www.osf.io](http://www.osf.io)) and medRxiv ([www.medrxiv.org](http://www.medrxiv.org)). The  
69 reference lists of eligible studies were searched manually to identify more studies that may have  
70 been eligible for inclusion in this review. Studies identified from the literature search were saved  
71 using the citation manager software programme (EndNote x8), which was also used to remove  
72 duplicates (Rathvon 2017).

### 73 Study selection

74 We included case-control, cross-sectional and cohort studies that investigated the prevalence of PLP  
75 in surgical, traumatic and congenital upper or lower limb amputees who were 18 years or older. The  
76 risk factors for PLP were identified from the included studies. Only studies written in English, with  
77 full text available, were eligible for inclusion in this review. We excluded studies that did not meet  
78 the inclusion criteria. Two reviewers (KL and GJB) independently screened study titles and abstracts  
79 for eligibility. Studies identified in the initial screening as potentially eligible were assessed for  
80 eligibility in full-text form by the same reviewers, using the inclusion/exclusion criteria. The study  
81 selection procedure was performed using a Microsoft Excel spreadsheet (2016) on which the studies  
82 were listed and marked as either eligible or ineligible. A PRISMA flow diagram (Fig 1) represents the  
83 entire screening process detailing the numbers of included and excluded studies, with reasons for  
84 exclusion. After each stage, results were compared, and disagreements resolved through discussion.

85 **Fig 1. The PRISMA flow diagram illustrating the screening process.**

86

## 87 [Risk of bias assessment](#)

88 Two reviewers (KL and GJB) independently assessed the included articles for risk of bias using a risk  
89 of bias assessment tool for prevalence studies that had been developed by Hoy et al (Hoy, Brooks et  
90 al. 2012). This tool assesses the risk of bias based on 10 categories which evaluate the study's  
91 external and internal validity. Each category of the risk of bias tool was set as "high risk" if the study  
92 scored "high risk" for any single item within that category, and "low risk" if it scored "low risk" for all  
93 items in that category. Categories with "low risk" and "high risk" were given a rating of zero and one  
94 respectively. The summary risk of bias rating for each study was presented as "low risk" (score: 0-3),  
95 "moderate risk" (score: 4-6), or "high risk" (score: 7-10).

## 96 [Data extraction](#)

97 Two reviewers (KL and GJB) used a pre-piloted customised data extraction sheet to independently  
98 extract relevant data from included studies. Data extracted included: the names of authors, year of  
99 study publication, study design and setting, country of study, sample size, participants' age and sex,  
100 site of amputation, method of data collection, PLP prevalence (%), as well as risk factors and their  
101 measures of association with PLP. The developmental status of the countries in which the studies  
102 were conducted was identified using the World Economic Situation and Prospects classification  
103 system (WESP 2018).

## 104 [Data analysis](#)

105 Data extracted from individual studies were entered into an Excel spreadsheet for analysis. All meta-  
106 analyses were conducted using Open Meta Analyst software available on  
107 (<http://www.cebm.brown.edu/openmeta>). In this, we deviated from the registered protocol, which  
108 specified the use of Review Manager 5, because Review Manager 5 is not suitable for conducting  
109 meta-analyses of single arm studies. Cohen's Kappa was used to report inter-rater agreement during  
110 screening, data extraction and risk of bias assessment, and can be interpreted as minimal (0-0.39),

111 weak (0.40-0.59), moderate (0.60-0.79) or strong (0.80-0.90) (Cohen 1960). Clinical heterogeneity  
112 was evaluated qualitatively, based on similarities or differences in participant and outcome  
113 characteristics, recruitment and assessment procedures, and study setting (Gagnier, Moher et al.  
114 2012). Statistical heterogeneity was assessed using the  $I^2$  statistic, and the results were presented as  
115 low (<25%), moderate (25-50%) and high (>50%) (Higgins, Thompson et al. 2003). Subject to  
116 consideration of heterogeneity and risk of bias, studies were pooled for meta-analysis using a  
117 random effects model to determine a sample-weighted summary estimate of PLP prevalence across  
118 all included studies. A funnel plot was generated to assess for possible publication bias. In addition,  
119 the Egger's test was conducted to assess the funnel plot for asymmetry (Egger, Smith et al. 1997). To  
120 address high statistical heterogeneity, we deviated from protocol to sub-group studies into those  
121 with low risk of bias and those with moderate and high risk of bias, and conducted separate meta-  
122 analyses, and compared the two pooled estimates using a two-tailed Mann-Whitney U test. We also  
123 sub-grouped studies by the developmental status of the country in which each study had been  
124 conducted (WESP 2018), as planned in the protocol and, again, compared the estimates using a two-  
125 tailed Mann-Whitney U test. Potential risk factors for PLP were identified from the included studies  
126 and synthesised descriptively. When an association was confirmed, the strength of association  
127 between PLP and each risk factor was classified as either "weak", "moderate", "strong" or "very  
128 strong", according to the guidelines for interpreting the strength of association in epidemiology  
129 studies (Rosenthal 1996, Nicolich and Gamble 2011, Healey 2014, Allen 2017). We calculated Phi ( $\emptyset$ )  
130 to determine the strength of association in studies that used the chi-square test as a measure of  
131 association. This sample-size-adjusted chi-square statistic has been shown to provide a more  
132 accurate reflection of the strength of association between two variables than the interpretation of  
133 chi-square and probability (P) values, where high chi-square and p values are thought to represent a  
134 strong association between variables (Frankfort-Nachmias and Leon-Guerrero 2017). Alpha was set  
135 at 0.05 for all analyses.

136

## 137 Results

138 The initial literature search returned 2677 records, of which 1783 remained after the removal of  
139 duplicates. Initial screening of titles and abstracts identified 85 studies that were eligible for full-text  
140 review. Full-text review identified 37 studies that were eligible for inclusion in this review. Three of  
141 these studies reported two studies each (Kooijman, Dijkstra et al. 2000, Reiber, McFarland et al.  
142 2010, Byrne 2011). Therefore, a total of 40 data sets were included in our analysis. The screening  
143 process reflected moderate agreement ( $Kappa=0.70$ ) between reviewers.

### 144 Study characteristics

145 The study characteristics are summarised in [Table 1](#). The included studies had used cross-sectional  
146 ( $n=38$ ) and cohort ( $n=2$ ) study designs. Thirty-three of 40 studies had been conducted in developed  
147 countries (WESP 2018). Of these, the majority had been conducted in North America [USA ( $n=7$ );  
148 Canada ( $n=2$ )] and Europe [United Kingdom ( $n=8$ ); Germany ( $n=5$ ); Netherlands ( $n=4$ ); Ireland ( $n=2$ );  
149 Poland ( $n=1$ )] ([Fig 2](#)). Only seven studies had been conducted in developing countries [Iran ( $n=2$ );  
150 Iraq ( $n=1$ ); India ( $n=1$ ); Brazil ( $n=1$ ); Pakistan ( $n=1$ ); Cambodia ( $n=1$ )]. [Table 1](#) reflects the wide range  
151 of data collection approaches used by the studies. The included studies had been published between  
152 1986 and 2019. The data extraction process had moderate agreement ( $Kappa=0.71$ ) between  
153 reviewers prior to discussion.

154 **Table 1. Summary of study and participant characteristics by study.**

155 **Fig 2. World map showing the countries in which the studies had been conducted.**

### 156 Participant characteristics

157 The eligible studies provided data from a total of 12765 participants (9826 male; 2196 female) who  
158 had undergone upper limb ( $n=2784$ ) and lower limb ( $n=10539$ ) amputations. Participant  
159 characteristics are provided in [Table 1](#).

160

## 161 [Risk of bias assessment](#)

162 The risk of bias assessment revealed moderate agreement ( $Kappa=0.69$ ) between reviewers prior to  
163 discussion. The results of the risk of bias assessment are reported in [Table 2](#). Four studies had an  
164 overall rating of “low risk” (Rayegani, Aryanmehr et al. 2010, Rahimi, Mousavi et al. 2012, Aldington,  
165 Small et al. 2014, Hnoosh 2014). Six studies scored “low risk” for selection bias, for using a sample  
166 that was a close representation of the national population (Ephraim, Wegener et al. 2005, Kern,  
167 Busch et al. 2009, Rahimi, Mousavi et al. 2012, Hnoosh 2014, Bekrater-Bodmann, Schredl et al. 2015,  
168 Morgan, Friedly et al. 2017). Eight studies scored “low risk” for study participation bias, because  
169 their response rates for participation were  $\geq 75\%$  (Wartan, Hamann et al. 1997, Kooijman, Dijkstra et  
170 al. 2000, Datta, Selvarajah et al. 2004, Richardson, Glenn et al. 2006, Rayegani, Aryanmehr et al.  
171 2010, Rahimi, Mousavi et al. 2012, Rafferty, Bennett Britton et al. 2015, Morgan, Friedly et al. 2017).  
172 Twelve studies scored “low risk” for measurement bias, for using a clear definition of PLP (Ehde,  
173 Czerniecki et al. 2000, Dijkstra, Geertzen et al. 2002, Ephraim, Wegener et al. 2005, Hanley, Ehde et  
174 al. 2006, Ketz 2008, Desmond and MacLachlan 2010, Rayegani, Aryanmehr et al. 2010, Aldington,  
175 Small et al. 2014, Hnoosh 2014, Bekrater-Bodmann, Schredl et al. 2015, Bin Ayaz, Ikram et al. 2015,  
176 Noguchi, Saito et al. 2019). Other studies scored “high risk” for measurement bias, for not providing  
177 a clear definition of PLP (e.g pain felt in the limb after amputation). All the studies scored “high risk”  
178 for measurement bias, for using an instrument that has not been shown to be valid and reliable for  
179 measuring the outcome of interest. However, all studies scored “low risk” for reporting bias, for  
180 appropriately reporting the numerators and denominators for the outcome of interest.

181 **Table 2. Summary of the risk of bias assessment results.**

## 182 [Prevalence of phantom limb pain](#)

183 The estimates of PLP prevalence in people with limb amputations ranged between 0% and 85.6%  
184 (Kooijman, Dijkstra et al. 2000, Clark, Bowling et al. 2013), with most studies (31 out of 40) reporting  
185 a prevalence between 50% and 85.6% (Byrne 2011, Clark, Bowling et al. 2013). A prevalence of 0%



186 was reported by the only included study that investigated PLP in adults with congenital amputations  
187 (Kooijman, Dijkstra et al. 2000). The pooling of all studies using a random effects model yielded an  
188 estimated prevalence of 63% [95% CI: 58.23-67.05], but with high statistical heterogeneity  
189 [ $I^2=95.70\%$  (95% CI: 95.10-96.20)] (Fig 3). The Egger's regression analysis of all the included studies  
190 revealed no publication bias [-0.85 (95%CI: -4.13-2.43);  $p=0.60$ ].

### 191 Exploratory subgrouping

192 We were concerned by the high statistical heterogeneity in the primary meta-analysis, so we opted  
193 to deviate from protocol to conduct two exploratory meta-analyses with studies sub-grouped  
194 according to risk of bias score. The first exploratory subgroup analysis, including only the studies that  
195 scored low risk of bias overall, estimated prevalence at 63% [95% CI: 58.31-67.90] with moderate  
196 statistical heterogeneity [ $I^2=44.91$  (95% CI: 43.90-45.20)] (Fig 4). The second exploratory subgroup  
197 analysis, including only the studies with moderate-high risk of bias, estimated prevalence at 63%  
198 [95% CI: 56.83-68.40], but with high statistical heterogeneity [ $I^2=97.75\%$  (95% CI: 96.17-98.76)] (Fig  
199 5). The Mann-Whitney U test that served as the sensitivity analysis for the effect of moderate-high  
200 risk of bias showed no difference between the estimated prevalence from these two meta-analyses  
201 [ $U=58.5$ ,  $p=0.22$ ].

202 **Fig 3. A forest plot showing the overall pooled estimated prevalence of PLP in people with**  
203 **amputations.**

204 **Fig 4. A subgroup analysis showing the pooled estimated prevalence of PLP in studies with low risk**  
205 **of bias.**

206 **Fig 5. A subgroup analysis showing the pooled estimated prevalence of PLP in studies with**  
207 **moderate to high risk of bias.**

208 The subgroup analyses stratified by the developmental status of the countries in which the studies  
209 were conducted showed an estimated pooled prevalence of 64.55% [95% CI: 59.62-69.34] in

210 developed countries and 53.98% [95% CI: 44.79-63.05] in developing countries (Figs 6 & 7). The  
211 Mann-Whitney U test showed a statistically significant difference between the prevalence estimates  
212 of these two meta-analyses [U=57, p=0.04].

213 **Fig 6. A subgroup analysis showing the pooled estimated prevalence of PLP in developed**  
214 **countries.**

215 **Fig 7. A subgroup analysis showing the pooled estimated prevalence of PLP in developing**  
216 **countries.**

### 217 [Risk factors for phantom limb pain](#)

218 Twenty-five potential risk factors had been studied in 15 studies representing 4102 participants. Of  
219 these, 10 pre-amputation, three peri-operative and eight post-amputation risk factors had data to  
220 support their positive association with PLP, and six pre-amputation, four peri-operative and three  
221 post-amputation risk factors had not been found to be positively associated with PLP. The risk  
222 factors found to be positively associated with PLP and their measures of association are summarised  
223 in [Table 3](#).

224 **Table 3. The summary of the risk factors for PLP and their measures of association with PLP.**

225 Lower limb amputation was positively associated with PLP (moderate to strong association) in two  
226 studies representing a total of 1450 participants (Dijkstra, Geertzen et al. 2002, Ephraim, Wegener et  
227 al. 2005). Stump pain was consistently positively associated with PLP (weak to very strong  
228 association) in seven studies representing a total of 1254 participants (Kooijman, Dijkstra et al. 2000,  
229 Dijkstra, Geertzen et al. 2002, Richardson, Glenn et al. 2006, Hanley, Jensen et al. 2007, Desmond  
230 and MacLachlan 2010, Ahmed, Bhatnagar et al. 2017, Larbig, Andoh et al. 2019). Phantom sensations  
231 were consistently positively associated with PLP (strong to very strong association) in four studies  
232 representing a total of 1156 participants (Wartan, Hamann et al. 1997, Kooijman, Dijkstra et al. 2000,  
233 Dijkstra, Geertzen et al. 2002, Razmus, Daniluk et al. 2017). Proximal site of amputation was

234 positively associated with PLP (very strong association) in two studies representing a total of 604  
235 participants (Gallagher, Butterworth et al. 1998, Dijkstra, Geertzen et al. 2002). Diabetic cause of  
236 amputation was positively associated with PLP (moderate to strong association) in two studies  
237 representing a total of 580 participants (Dijkstra, Geertzen et al. 2002, Noguchi, Saito et al. 2019).  
238 Persistent pre-amputation pain was positively associated with PLP in five studies representing a total  
239 of 881 participants (weak to very strong association) (Larbig, Montoya et al. 1996, Hanley, Jensen et  
240 al. 2007, Ahmed, Bhatnagar et al. 2017, Yin, Zhang et al. 2017, Noguchi, Saito et al. 2019) but was  
241 not associated with PLP in two studies representing a total of 625 participants. The risk factors which  
242 were not found to be positively associated with PLP are summarised in [Table 4](#). Sex, age and  
243 traumatic cause of amputation were the most commonly assessed of these proposed risk factors.  
244 Sex was consistently not associated with PLP in six studies representing a total of 1836 participants  
245 (Kooijman, Dijkstra et al. 2000, Ephraim, Wegener et al. 2005, Dijkstra 2006, Hanley, Ehde et al.  
246 2009, Ahmed, Bhatnagar et al. 2017, Noguchi, Saito et al. 2019). Age was not associated with PLP in  
247 three studies representing a total of 1062 participants (Ephraim, Wegener et al. 2005, Hanley, Ehde  
248 et al. 2009, Noguchi, Saito et al. 2019) but higher age was positively associated with PLP (weak  
249 association) in one study representing a total of 716 participants (Buchanan and Mandel 1986). A  
250 traumatic cause of amputation was not associated with PLP in two studies representing a total of  
251 958 participants (Ephraim, Wegener et al. 2005, Noguchi, Saito et al. 2019) but was positively  
252 associated with PLP (very strong association) in one study representing a total of 104 participants  
253 (Gallagher, Allen et al. 2001). The meta-analysis of risk factors for PLP could not be conducted  
254 because of variations in methods of data collection and analysis across the included studies.

255 **Table 4. The summary of factors not associated with increased risk for PLP and their measures of**  
256 **association with PLP.**

257

## 258 Discussion

259 According to our knowledge, this is the first systematic review to pool the literature on the  
260 prevalence and risk factors for PLP in people with limb amputations. The results of this study  
261 estimate that PLP affects 63% of people with amputations. In addition, this study identified that  
262 lower limb amputation, stump pain, phantom sensations, persistent pre-amputation pain, proximal  
263 site of amputation and diabetic cause of amputation are risk factors for PLP.

### 264 Phantom limb pain prevalence

265 The current primary meta-analysis estimated that 63% of people with amputations report PLP. This  
266 estimate suggests that approximately 8042 of 12765 participants in this study reported PLP.  
267 Interestingly, dividing studies by risk of bias revealed no difference in estimated prevalence, despite  
268 the 'low risk of bias' subgroup's meta-analysis having lower statistical heterogeneity. In addition, the  
269 results of the Egger's regression test indicated that the asymmetry of the funnel plot (Fig 8) was not  
270 significant ( $p=0.60$ ), thus failing to suggest the presence of publication bias. Altogether, these  
271 findings suggest that the included studies provide a reasonably stable estimate of the prevalence of  
272 PLP in the population of people with amputations. The prevalence of PLP appears to be high,  
273 supporting that health professionals should be aware of the risk of this complication and that  
274 pragmatic interventions for preventing or alleviating PLP are needed.

### 275 **Fig 8. Funnel plot using data from the 40 included studies.**

276 The meta-analysis that stratified the studies by country developmental status suggested that the  
277 prevalence of PLP was significantly lower in developing countries compared to developed countries  
278 [53.98% vs 64.55%;  $p=0.04$ ]. This discrepancy is surprising and might be an artefact of selection bias  
279 linked either to the lower response rate seen in most of the studies conducted in developing  
280 countries, or to the strategy of recruiting participants from amongst patients receiving follow-up  
281 medical care. This recruitment strategy common in the developing country studies may have  
282 contributed to underestimation of PLP prevalence if amputees with PLP (in developing countries)

283 without continuing medical care were excluded from samples, or may have contributed to an  
284 overestimation of PLP prevalence if having PLP made amputees more likely to remain in medical  
285 care. This uncertainty highlights the need to develop and implement novel recruitment strategies  
286 specific to people with amputations in developing countries so that they can be accounted for in  
287 future studies.

288 The included studies had varying risk of bias. However, the lack of statistically significant difference  
289 between the prevalence estimates from pooling of the studies with low risk of bias and pooling of  
290 the studies with moderate-high risk of bias suggests that the overall risk of bias in included studies  
291 had little impact on the prevalence of PLP. Nonetheless, the high risk of bias attributed to most  
292 studies for using an ambiguous definition of PLP (e.g pain felt in the limb after amputation) leaves  
293 the possibility that participants might have confused residual limb pain and PLP. We suspect that this  
294 might have resulted in an overestimation of the prevalence of PLP.

295 It is noteworthy that a prevalence of 0% was reported by the only study in this review that  
296 investigated PLP in adults with congenital amputations (Kooijman, Dijkstra et al. 2000). These  
297 findings are similar to those of other studies (not eligible for this review) that reported a low PLP  
298 prevalence of 7% (out of 57 patients) and 5.7% (out of 88 patients) in children with congenital  
299 amputations (Boonstra, Rijnders et al. 2000, Garcia, Flores et al. 2018). Although a robust conclusion  
300 cannot be drawn from three small studies, these findings suggest that people with congenital  
301 amputations may be less likely to experience PLP than those whose amputations were due to  
302 trauma or surgery (Gallagher, Allen et al. 2001). Perhaps the peripheral nerves severed during  
303 amputation play an important role in the initiation of PLP after amputation (Vaso, Adahan et al.  
304 2014). In addition, the absence of pre-operative and peri-operative risk factors for PLP in this group  
305 might contribute to the low prevalence.

306

### 307 Phantom limb pain risk factors

308 Five studies showed that PLP was more likely to occur in people who reported a history of persistent  
309 pre-operative pain than in those who did not report having had persistent limb pain prior to their  
310 amputation. One physiological mechanism that has been proposed to explain the link between pre-  
311 amputation pain and PLP is central sensitisation - where persistent pre-operative pain contributes to  
312 the hyperexcitability of the nervous system and functional changes in the cortical areas involved in  
313 the generation of pain (Lee, Zambreanu et al. 2008). These changes may continue to upregulate  
314 peripheral input after limb amputation, thus promoting PLP that shares the characteristics with pre-  
315 amputation pain (Rathmell and Kehlet 2011). In fact, over 60% of the patients who experienced  
316 persistent pre-amputation pain reported similar characteristics of their PLP (Jensen, Krebs et al.  
317 1985, Katz and Melzack 1990). This apparent relationship highlights the importance of addressing  
318 limb pain very early in patients who are at high risk of having their limbs amputated. The early and  
319 effective management of pre-amputation pain may reduce risk of developing PLP and improve  
320 physical and psychological outcomes often related to delayed or ineffective management of PLP  
321 (Hanley, Jensen et al. 2004, Hanley, Jensen et al. 2007)

322 Two studies showed that PLP was more likely to occur after lower limb amputation than after upper  
323 limb amputation (Ephraim, Wegener et al. 2005, Dijkstra 2006). The authors proposed that the use  
324 of a cosmetic prosthetic leg, rather than a prosthesis that provided sensory input was a likely  
325 contributor to pain in people with lower limb amputations since 70%-78.8% of cosmetic prosthetic  
326 leg users had PLP. Lack of proprioceptive feedback during the use of a prosthetic leg has been linked  
327 to poor motor control, possibly leading to stump irritation that may trigger PLP (Morgan, Friedly et  
328 al. 2017, Page, George et al. 2018). This proposed link is partially supported by seven studies in this  
329 review which suggested that PLP was more likely to occur in people with stump pain than in those  
330 without stump pain (Kooijman, Dijkstra et al. 2000, Dijkstra, Geertzen et al. 2002, Hanley, Ehde et al.  
331 2006, Richardson, Glenn et al. 2006, Desmond and MacLachlan 2010, Ahmed, Bhatnagar et al. 2017,

332 Larbig, Andoh et al. 2019). Interestingly, Dietrich and colleagues investigated the effects of a leg  
333 prosthesis with somatosensory feedback on pain and lower limb function (Dietrich, Nehrlich et al.  
334 2018). In that study, participants used prosthetic legs with pressure sensors that provided  
335 comfortable electrical feedback to the patient's thigh whenever the prosthetic foot touched the  
336 ground. At the end of two weeks of training, the participants had improved function of the lower  
337 limb and reduced severity and frequency of PLP. Further, the patients reported greater satisfaction,  
338 longer walking distances and improved dynamic stability than prior to the training. These results  
339 suggest that people with lower limb amputations might benefit more from using a prosthetic leg  
340 with somatosensory feedback than from using a cosmetic prosthesis. However, the mechanisms by  
341 which prosthetic legs with somatosensory feedback reduce PLP are not clear. Therefore, it would be  
342 interesting to investigate the mechanisms by which somatosensory feedback from a prosthetic leg  
343 might influence PLP.

344 Four studies showed that PLP was more likely to occur in amputees with non-painful phantom  
345 sensations than in those without non-painful phantom sensations (Wartan, Hamann et al. 1997,  
346 Kooijman, Dijkstra et al. 2000, Razmus, Daniluk et al. 2017). In these studies, 70%-100% of amputees  
347 with phantom sensations also had PLP. The co-occurrence of these post-amputation sensations  
348 suggest that they may share neural mechanisms with PLP (Razmus, Daniluk et al. 2017). An fMRI  
349 study by Andoh et al showed that inducing non-painful phantom sensations in people with  
350 amputations activated the somatosensory and premotor cortices contralateral to the amputated  
351 limb (Andoh, Diers et al. 2017). The activation of similar cortical areas has been recorded in patients  
352 with PLP upon induction of their PLP (Flor and Elbert 1995, Lotze, Montoya et al. 1999, Karl,  
353 Birbaumer et al. 2001, Lotze, Flor et al. 2001, Flor, Nikolajsen et al. 2006). The similarities in cortical  
354 activation patterns might explain a link between PLP and non-painful phantom sensations.

355 Two studies showed that PLP was more likely to occur in people with proximal amputations than in  
356 those with distal amputations (Gallagher, Allen et al. 2001, Dijkstra, Geertzen et al. 2002). These

357 findings line up with a narrative review that reported an increase in the incidence of PLP with more  
358 proximal amputations (Manchikanti and Singh 2004). Proximal amputations are associated with an  
359 increased risk of failure of wound healing, which may result in infection or stump pain (Stone,  
360 Flaherty et al. 2006). However, the reasons why proximal amputations should be more likely to lead  
361 to PLP than distal amputations are not clear (Kelle, Kozanoglu et al. 2017).

362 Another interesting finding was that the lack of pre-amputation counselling was positively associated  
363 with PLP (strong association) in a study representing a total of 104 participants (Gallagher, Allen et  
364 al. 2001). This suggests that patients who receive counselling prior to their amputation maybe less  
365 likely to report PLP compared to those who do not receive counselling. The exact details of the  
366 counselling were not reported. However, the strong association between the pre-operative  
367 counselling and pain reduction highlights the importance of pre-amputation counselling on PLP. No  
368 other study has specifically identified pre-operative counselling as a predictor of decreased PLP after  
369 limb amputation. However, the results of a narrative review suggest that pre-operative counselling  
370 may improve outcomes in patients undergoing various forms of surgery (Powell, Scott et al. 2016).

### 371 Limitations

372 The sample in this systematic review was skewed towards males, in that 9826 (81.73%) of the 12022  
373 participants were male. Therefore, the results might not hold for females. We could not perform a  
374 subgroup analysis by sex because we did not have individual patient data, nor was analysis by sex an  
375 objective identified in the protocol. However, the data on risk factors provide no support for sex  
376 influencing the likelihood of PLP after amputation. It was not possible to conduct a meta-analysis on  
377 the risk factors for PLP because the included studies used varying methodological approaches and  
378 measures of association. None of the included studies used an outcome measure that has been  
379 validated for assessing PLP. In fact, we are not aware of any instrument that has been validated for  
380 assessing PLP. Such a standardised tool for assessing PLP would be useful to provide us with reliable  
381 data. Most studies in this review had moderate-high risk of bias. There is a clear need for high-



382 quality studies to raise the credibility of future meta-analyses. Finally, the search strategy for this  
383 study was designed specifically to identify prevalence studies. Therefore, although we did conduct  
384 an exploratory search for additional studies of risk factors for PLP, there is a possibility that we could  
385 have missed some studies that investigated risk factors for PLP if they did not also estimate PLP  
386 prevalence. In consideration of this possibility, the review of risk factors was classified as an  
387 exploratory analysis. It is important to note that the results of this systematic review were derived  
388 from studies conducted mostly in Europe, North-America and Asia. To the best of our knowledge, no  
389 study has been conducted in Africa, and research in this area is indicated to inform us about the  
390 burden and risk factors for PLP in the African population.

### 391 [Conclusion](#)

392 This systematic review and meta-analysis estimates that six of every 10 people with an amputation  
393 report PLP – a high and important prevalence of PLP. Health care professionals ought to be aware of  
394 the high rates of PLP and implement strategies to reduce PLP by addressing known risk factors,  
395 specifically those identified by the current study. Stump pain and post-amputation depression are all  
396 known and modifiable risk factors that are consistently positively associated with PLP. Awareness of  
397 these risk factors may motivate health care professionals to address them early in treatment to  
398 prevent the onset of PLP in people with amputations.

### 399 [Acknowledgements](#)

400 The authors thank Mrs Mary Shelton (Health Sciences reference librarian, University of Cape Town)  
401 for assisting with the development of the search strategy.

## 402 **References**

- 403 Ahmed, A., S. Bhatnagar, S. Mishra, D. Khurana, S. Joshi and S. M. Ahmad (2017). "Prevalence of  
404 phantom limb pain, stump pain, and phantom limb sensation among the amputated cancer patients  
405 in India: A prospective, observational study." Indian journal of palliative care **23**(1): 24.
- 406 Aldington, D., C. Small, D. Edwards, J. Ralph, P. Woods, S. Jagdish and R. A. Moore (2014). "A survey  
407 of post-amputation pains in serving military personnel." J R Army Med Corps **160**(1): 38-41.
- 408 Allen, M. (2017). The SAGE encyclopedia of communication research methods, SAGE Publications.
- 409 Andoh, J., M. Diers, C. Milde, C. Frobel, D. Kleinböhl and H. Flor (2017). "Neural correlates of evoked  
410 phantom limb sensations." Biological Psychology **126**: 89-97.
- 411 Bekrater-Bodmann, R., M. Schredl, M. Diers, I. Reinhard, J. Foell, J. Trojan, X. Fuchs and H. Flor  
412 (2015). "Post-amputation pain is associated with the recall of an impaired body representation in  
413 dreams-results from a nation-wide survey on limb amputees." PLoS One **10**(3): e0119552.
- 414 Bin Ayaz, S., M. Ikram, S. Matee, A. A. Khan, M. Ahmad and M. Fahim (2015). "FREQUENCY AND THE  
415 RELATED SOCIO-DEMOGRAPHIC AND CLINICAL FACTORS OF PHANTOM LIMB PAIN IN TRAUMATIC  
416 AMPUTEES PRESENTING AT A TERTIARY CARE REHABILITATION SETUP." Pakistan Armed Forces  
417 Medical Journal(6): 782-788.
- 418 Boonstra, A. M., L. J. Rijnders, J. W. Groothoff and W. H. Eisma (2000). "Children with congenital  
419 deficiencies or acquired amputations of the lower limbs: functional aspects." Prosthet Orthot Int  
420 **24**(1): 19-27.
- 421 Buchanan, D. C. and A. R. Mandel (1986). "The prevalence of phantom limb experience in  
422 amputees." Rehabilitation Psychology **31**(3): 183.
- 423 Byrne, K. P. (2011). "Survey of phantom limb pain, phantom sensation and stump pain in Cambodian  
424 and New Zealand amputees." Pain Med **12**(5): 794-798.
- 425 Clark, R. L., F. L. Bowling, F. Jepson and S. Rajbhandari (2013). "Phantom limb pain after amputation  
426 in diabetic patients does not differ from that after amputation in nondiabetic patients." Pain **154**(5):  
427 729-732.

- 428 Cohen, J. (1960). "A coefficient of agreement for nominal scales." Educational and psychological  
429 measurement **20**(1): 37-46.
- 430 Datta, D., K. Selvarajah and N. Davey (2004). "Functional outcome of patients with proximal upper  
431 limb deficiency -- acquired and congenital." Clinical Rehabilitation **18**(2): 172-177.
- 432 Desmond, D. M. and M. MacLachlan (2010). "Prevalence and characteristics of phantom limb pain  
433 and residual limb pain in the long term after upper limb amputation." International Journal of  
434 Rehabilitation Research **33**(3): 279-282.
- 435 Dietrich, C., S. Nehrdich, S. Seifert, K. R. Blume, W. H. R. Miltner, G. O. Hofmann and T. Weiss (2018).  
436 "Leg Prosthesis With Somatosensory Feedback Reduces Phantom Limb Pain and Increases  
437 Functionality." Frontiers in Neurology **9**(270).
- 438 Dijkstra, P. U. (2006). "'Re: Phantom limb pain': Commentary reply." Journal of Pain and Symptom  
439 Management **32**(2): 103-103.
- 440 Dijkstra, P. U., H. B. Geertzen, R. Stewart and C. P. van der Schans (2002). "Phantom Pain and Risk  
441 Factors: A Multivariate Analysis." Journal of Pain and Symptom Management **24**(6): 578-585.
- 442 Egger, M., G. D. Smith, M. Schneider and C. Minder (1997). "Bias in meta-analysis detected by a  
443 simple, graphical test." Bmj **315**(7109): 629-634.
- 444 Ehde, D. M., J. M. Czerniecki, D. G. Smith, K. M. Campbell, W. T. Edwards, M. P. Jensen and L. R.  
445 Robinson (2000). "Chronic phantom sensations, phantom pain, residual limb pain, and other regional  
446 pain after lower limb amputation." Archives of physical medicine and rehabilitation **81**(8): 1039-  
447 1044.
- 448 Ephraim, P. L., S. T. Wegener, E. J. MacKenzie, T. R. Dillingham and L. E. Pezzin (2005). "Phantom  
449 pain, residual limb pain, and back pain in amputees: results of a national survey." Archives of  
450 Physical Medicine & Rehabilitation **86**(10): 1910-1919.
- 451 Flor, H. and T. Elbert (1995). "Phantom-limb pain as a perceptual correlate of cortical reorganization  
452 following arm amputation." Nature **375**(6531): 482.

- 453 Flor, H., L. Nikolajsen and T. S. Jensen (2006). "Phantom limb pain: a case of maladaptive CNS  
454 plasticity?" Nature Reviews Neuroscience **7**(11): 873.
- 455 Frankfort-Nachmias, C. and A. Leon-Guerrero (2017). Social statistics for a diverse society, Sage  
456 Publications.
- 457 Gagnier, J. J., D. Moher, H. Boon, J. Beyene and C. Bombardier (2012). "Investigating clinical  
458 heterogeneity in systematic reviews: a methodologic review of guidance in the literature." BMC  
459 medical research methodology **12**(1): 111.
- 460 Gallagher, P., D. Allen and M. MacLachlan (2001). "Phantom limb pain and residual limb pain  
461 following lower limb amputation: a descriptive analysis." Disability & Rehabilitation **23**(12): 522-530.
- 462 Gallagher, S., G. E. Butterworth, A. Lew and J. Cole (1998). "Hand-mouth coordination, congenital  
463 absence of limb, and evidence for innate body schemas." Brain Cogn **38**(1): 53-65.
- 464 Garcia, D., E. Flores, P. Nahuelhual and F. Solis (2018). "Phantom pain in congenital amputees: Myth  
465 or reality?" Annals of Physical and Rehabilitation Medicine **61**: e118.
- 466 Gosselin, R. A., Y. A. Gyamfi and S. Contini (2011). "Challenges of meeting surgical needs in the  
467 developing world." World J Surg **35**(2): 258-261.
- 468 Hanley, M. A., D. M. Ehde, K. M. Campbell, B. Osborn and D. G. Smith (2006). "Self-reported  
469 treatments used for lower-limb phantom pain: descriptive findings." Archives of Physical Medicine &  
470 Rehabilitation **87**(2): 270-311.
- 471 Hanley, M. A., D. M. Ehde, M. Jensen, J. Czerniecki, D. C. Smith and L. R. Robinson (2009). "Chronic  
472 Pain Associated with Upper-Limb Loss." American Journal of Physical Medicine & Rehabilitation  
473 **88**(9): 742-754.
- 474 Hanley, M. A., M. P. Jensen, D. M. Ehde, A. J. Hoffman, D. R. Patterson and L. R. Robinson (2004).  
475 "Psychosocial predictors of long-term adjustment to lower-limb amputation and phantom limb  
476 pain." Disability & Rehabilitation **26**(14/15): 882-893.

477 Hanley, M. A., M. P. Jensen, D. G. Smith, D. M. Ehde, W. T. Edwards and L. R. Robinson (2007).  
478 "Pre-amputation Pain and Acute Pain Predict Chronic Pain After Lower Extremity Amputation." The  
479 Journal of Pain **8**(2): 102-109.

480 Healey, J. F. (2014). Statistics: A tool for social research, Cengage Learning.

481 Higgins, J. P., S. G. Thompson, J. J. Deeks and D. G. Altman (2003). "Measuring inconsistency in meta-  
482 analyses." BMJ: British Medical Journal **327**(7414): 557.

483 Hnoosh, A. H. (2014). "Phantom Limb and pain after traumatic lower extremity amputation." Journal  
484 of the Faculty of Medicine **56**(1): 57-61.

485 Hoy, D., P. Brooks, A. Woolf, F. Blyth, L. March, C. Bain, P. Baker, E. Smith and R. Buchbinder (2012).  
486 "Assessing risk of bias in prevalence studies: modification of an existing tool and evidence of  
487 interrater agreement." Journal of clinical epidemiology **65**(9): 934-939.

488 Jensen, T. S., B. Krebs, J. Nielsen and P. Rasmussen (1985). "Immediate and long-term phantom limb  
489 pain in amputees: incidence, clinical characteristics and relationship to pre-amputation limb pain."  
490 Pain **21**(3): 267-278.

491 Karl, A., N. Birbaumer, W. Lutzenberger, L. G. Cohen and H. Flor (2001). "Reorganization of motor  
492 and somatosensory cortex in upper extremity amputees with phantom limb pain." Journal of  
493 Neuroscience **21**(10): 3609-3618.

494 Katz, J. and R. Melzack (1990). "Pain 'memories' in phantom limbs: Review and clinical observations."  
495 Pain **43**(3): 319-336.

496 Kelle, B., E. Kozanoglu, O. S. Bicer and I. Tan (2017). "Association between phantom limb complex  
497 and the level of amputation in lower limb amputee." Acta Orthop Traumatol Turc **51**(2): 142-145.

498 Kern, U., V. Busch, M. Rockland, M. Kohl and F. Birklein (2009). "[Prevalence and risk factors of  
499 phantom limb pain and phantom limb sensations in Germany. A nationwide field survey]." Schmerz  
500 **23**(5): 479-488.

501 Ketz, A. K. (2008). "The experience of phantom limb pain in patients with combat-related traumatic  
502 amputations." Archives of Physical Medicine & Rehabilitation **89**(6): 1127-1132.

503 Kooijman, C. M., P. U. Dijkstra, J. H. Geertzen, A. Elzinga and C. P. van der Schans (2000). "Phantom  
504 pain and phantom sensations in upper limb amputees: an epidemiological study." Pain **87**(1): 33-41.

505 Larbig, W., J. Andoh, E. Huse, D. Stahl-Corino, P. Montoya, Z. e. Seltzer and H. Flor (2019). "Pre-and  
506 postoperative predictors of phantom limb pain." Neuroscience letters **702**: 44-50.

507 Larbig, W., P. Montoya, H. Flor, H. Bilow, S. Weller and N. Birbaumer (1996). "Evidence for a change  
508 in neural processing in phantom limb pain patients." Pain **67**(2-3): 275-283.

509 Lee, M. C., L. Zambreanu, D. K. Menon and I. Tracey (2008). "Identifying brain activity specifically  
510 related to the maintenance and perceptual consequence of central sensitization in humans." J  
511 Neurosci **28**(45): 11642-11649.

512 Limakatso, K., G. J. Bedwell, V. J. Madden and R. Parker (2019). "The prevalence of phantom limb  
513 pain and associated risk factors in people with amputations: a systematic review protocol."  
514 Systematic reviews **8**(1): 17-17.

515 Lotze, M., H. Flor, W. Grodd, W. Larbig and N. Birbaumer (2001). "Phantom movements and pain An  
516 fMRI study in upper limb amputees." Brain **124**(11): 2268-2277.

517 Lotze, M., P. Montoya, M. Erb, E. Hülsmann, H. Flor, U. Klose, N. Birbaumer and W. Grodd (1999).  
518 "Activation of cortical and cerebellar motor areas during executed and imagined hand movements:  
519 an fMRI study." Journal of cognitive neuroscience **11**(5): 491-501.

520 Maimela, E., M. Alberts, S. E. Modjadji, S. S. Choma, S. A. Dikotope, T. S. Ntuli and J.-P. Van  
521 Geertruyden (2016). "The prevalence and determinants of chronic non-communicable disease risk  
522 factors amongst adults in the Dikgale health demographic and surveillance system (HDSS) site,  
523 Limpopo Province of South Africa." PLoS One **11**(2): e0147926.

524 Manchikanti, L. and V. Singh (2004). "Managing phantom pain." Pain Physician **7**(3): 365-375.

525 Mishra, S., S. Bhatnagar, D. Gupta and A. Diwedi (2008). "Incidence and management of phantom  
526 limb pain according to World Health Organization analgesic ladder in amputees of malignant origin."  
527 American Journal of Hospice and Palliative Medicine® **24**(6): 455-462.

528 Moher, D., L. Shamseer, M. Clarke, D. Gherzi, A. Liberati, M. Petticrew, P. Shekelle, L. A. Stewart and  
529 P.-P. Group (2015). "Preferred reporting items for systematic review and meta-analysis protocols  
530 (PRISMA-P) 2015 statement." Systematic Reviews **4**(1): 1.

531 Moloj, A. H., D. Watkins, M. E. Engel, S. Mall and L. Zühlke (2016). "Epidemiology, health systems and  
532 stakeholders in rheumatic heart disease in Africa: a systematic review protocol." BMJ open **6**(5):  
533 e011266.

534 Morgan, S. J., J. L. Friedly, D. Amtmann, R. Salem and B. J. Hafner (2017). "Cross-Sectional  
535 Assessment of Factors Related to Pain Intensity and Pain Interference in Lower Limb Prosthesis  
536 Users." Arch Phys Med Rehabil **98**(1): 105-113.

537 Neil, M. (2015). "Pain after amputation." BJA Education **16**(3): 107-112.

538 Nicolich, M. J. and J. F. Gamble (2011). "What is the minimum risk that can be estimated from an  
539 epidemiology Study." Advanced Topics in Environmental Health and Air Pollution Case Studies: 3-26.

540 Noguchi, S., J. Saito, K. Nakai, M. Kitayama and K. Hirota (2019). "Factors affecting phantom limb  
541 pain in patients undergoing amputation: retrospective study." Journal of anaesthesia **33**(2): 216-220.

542 Page, D. M., J. A. George, D. T. Kluger, C. Duncan, S. Wendelken, T. Davis, D. T. Hutchinson and G. A.  
543 Clark (2018). "Motor Control and Sensory Feedback Enhance Prosthesis Embodiment and Reduce  
544 Phantom Pain After Long-Term Hand Amputation." Frontiers in Human Neuroscience **12**.

545 Powell, R., N. W. Scott, A. Manyande, J. Bruce, C. Vogele, L. M. Byrne-Davis, M. Unsworth, C. Osmer  
546 and M. Johnston (2016). "Psychological preparation and postoperative outcomes for adults  
547 undergoing surgery under general anaesthesia." Cochrane Database Syst Rev(5): Cd008646.

548 Rafferty, M., T. M. Bennett Britton, B. T. Drew and R. D. Phillip (2015). "Cross-sectional study of  
549 alteration of phantom limb pain with visceral stimulation in military personnel with amputation." J  
550 Rehabil Res Dev **52**(4): 441-448.

551 Rahimi, A., B. Mousavi, M. Soroush, M. Masumi and A. Montazeri (2012). "Pain and health-related  
552 quality of life in war veterans with bilateral lower limb amputations." Trauma Monthly **17**(2): 282-  
553 286.

- 554 Rathmell, J. P., M.D. and H. Kehlet, M.D., Ph.D. (2011). "Do We Have the Tools to Prevent Phantom  
555 Limb Pain?" Anesthesiology: The Journal of the American Society of Anesthesiologists **114**(5): 1021-  
556 1024.
- 557 Rathvon, D. (2017). "EndNote X8--Citation Manager--What's New?".
- 558 Rayegani, S. M., A. Aryanmehr, M. R. Soroosh and M. Baghbani (2010). "Phantom pain, phantom  
559 sensation, and spine pain in bilateral lower limb amputees: Results of a national survey of Iraq-Iran  
560 war victims' health status." Journal of Prosthetics and Orthotics **22**(3): 162-165.
- 561 Razmus, M., B. Daniluk and P. Markiewicz (2017). "Phantom limb phenomenon as an example of  
562 body image distortion." Current Problems of Psychiatry **18**(2): 153-159.
- 563 Reiber, G. E., L. V. McFarland, S. Hubbard, C. Maynard, D. K. Blough, J. M. Gambel and D. G. Smith  
564 (2010). "Servicemembers and veterans with major traumatic limb loss from Vietnam war and  
565 OIF/OEF conflicts: Survey methods, participants, and summary findings." Journal of Rehabilitation  
566 Research & Development **47**(3): 275-297.
- 567 Richardson, C., S. Glenn, T. Nurmikko and M. Horgan (2006). "Incidence of phantom phenomena  
568 including phantom limb pain 6 months after major lower limb amputation in patients with peripheral  
569 vascular disease." The Clinical journal of pain **22**(4): 353-358.
- 570 Rosenthal, J. A. (1996). "Qualitative descriptors of strength of association and effect size." Journal of  
571 social service Research **21**(4): 37-59.
- 572 Sherman, R. A., C. J. Sherman and N. G. Gall (1980). "A survey of current phantom limb pain  
573 treatment in the United States." Pain **8**(1): 85-99.
- 574 Stone, P. A., S. K. Flaherty, A. F. AbuRahma, S. M. Hass, J. M. Jackson, J. D. Hayes, M. J. Hofeldt, C. S.  
575 Hager and M. S. Elmore (2006). "Factors affecting perioperative mortality and wound-related  
576 complications following major lower extremity amputations." Annals of vascular surgery **20**(2): 209-  
577 216.
- 578 Vaso, A., H.-M. Adahan, A. Gjika, S. Zahaj, T. Zhurda, G. Vyshka and M. Devor (2014). "Peripheral  
579 nervous system origin of phantom limb pain." PAIN® **155**(7): 1384-1391.



580 Ventham, N., P. Heyburn and N. Huston (2010). "Prevalence of phantom limb pain in diabetic and  
581 non-diabetic leg amputees: a cross-sectional observational survey." European Journal of Pain  
582 Supplements **4**(1): 106-107.

583 Warton, S. W., W. Hamann, J. R. Wedley and I. McColl (1997). "Phantom pain and sensation among  
584 British veteran amputees." Br J Anaesth **78**(6): 652-659.

585 Weeks, S. R., V. C. Anderson-Barnes and J. W. Tsao (2010). "Phantom limb pain: theories and  
586 therapies." The neurologist **16**(5): 277-286.

587 WESP. (2018). "Data sources, country classifications and aggregation methodology. (2014, January  
588 25)." (2014, January 25), from Retrieved from  
589 [http://www.un.org/en/development/desa/policy/wesp/wesp\\_current/2014wesp\\_country\\_classifica](http://www.un.org/en/development/desa/policy/wesp/wesp_current/2014wesp_country_classification.pdf)  
590 [tion.pdf](http://www.un.org/en/development/desa/policy/wesp/wesp_current/2014wesp_country_classification.pdf).

591 Yin, Y., L. Zhang, H. Xiao, C.-B. Wen, Y.-E. Dai, G. Yang, Y.-X. Zuo and J. Liu (2017). "The pre-  
592 amputation pain and the postoperative deafferentation are the risk factors of phantom limb pain: a  
593 clinical survey in a sample of Chinese population." BMC anesthesiology **17**(1): 69.

594

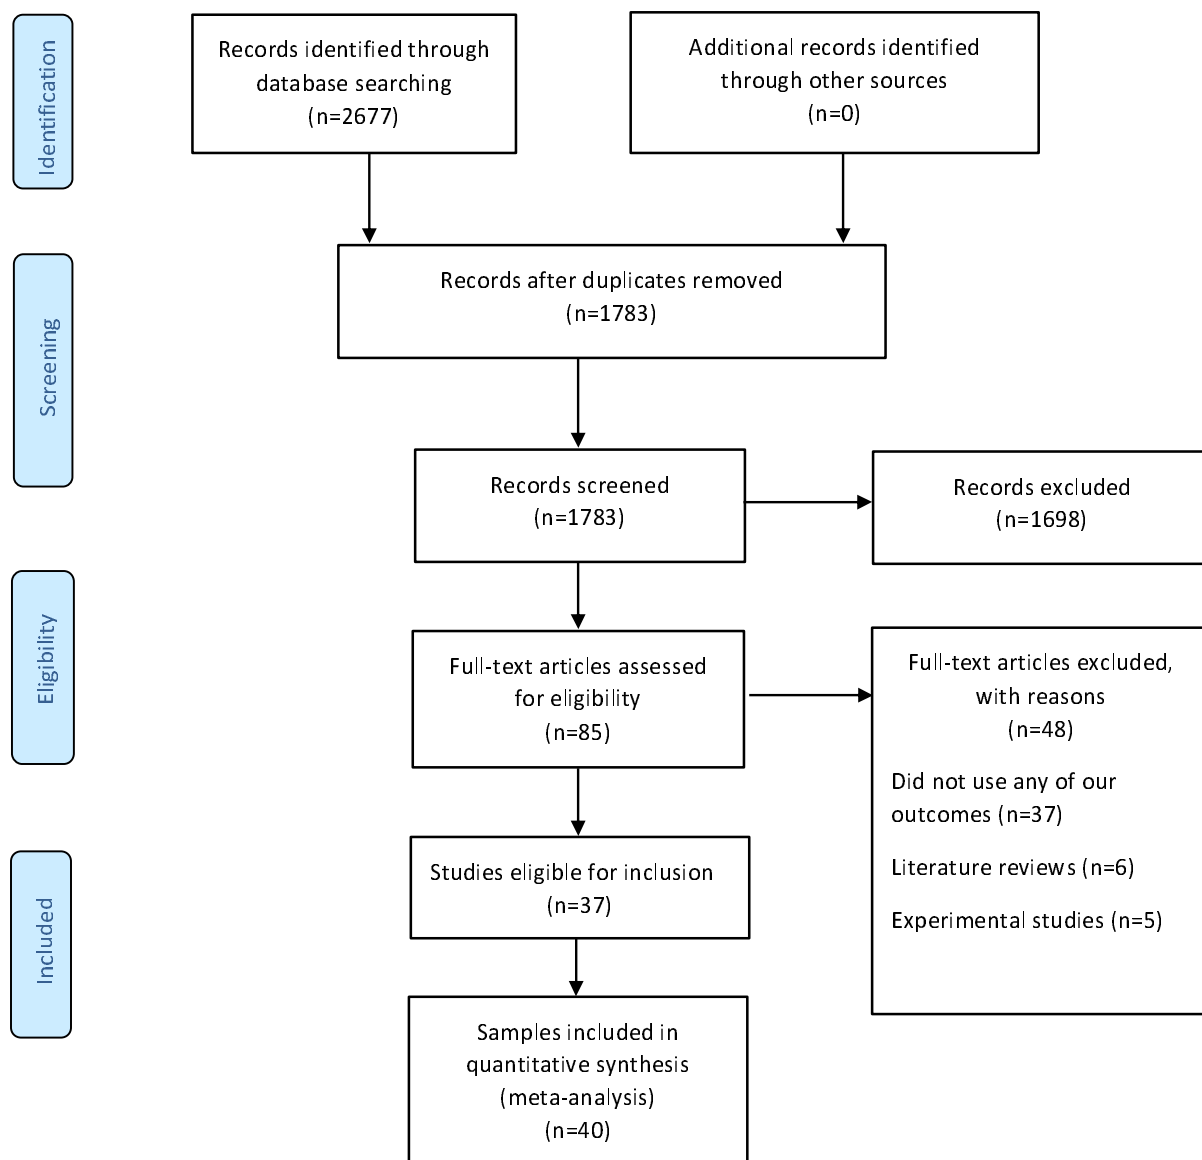

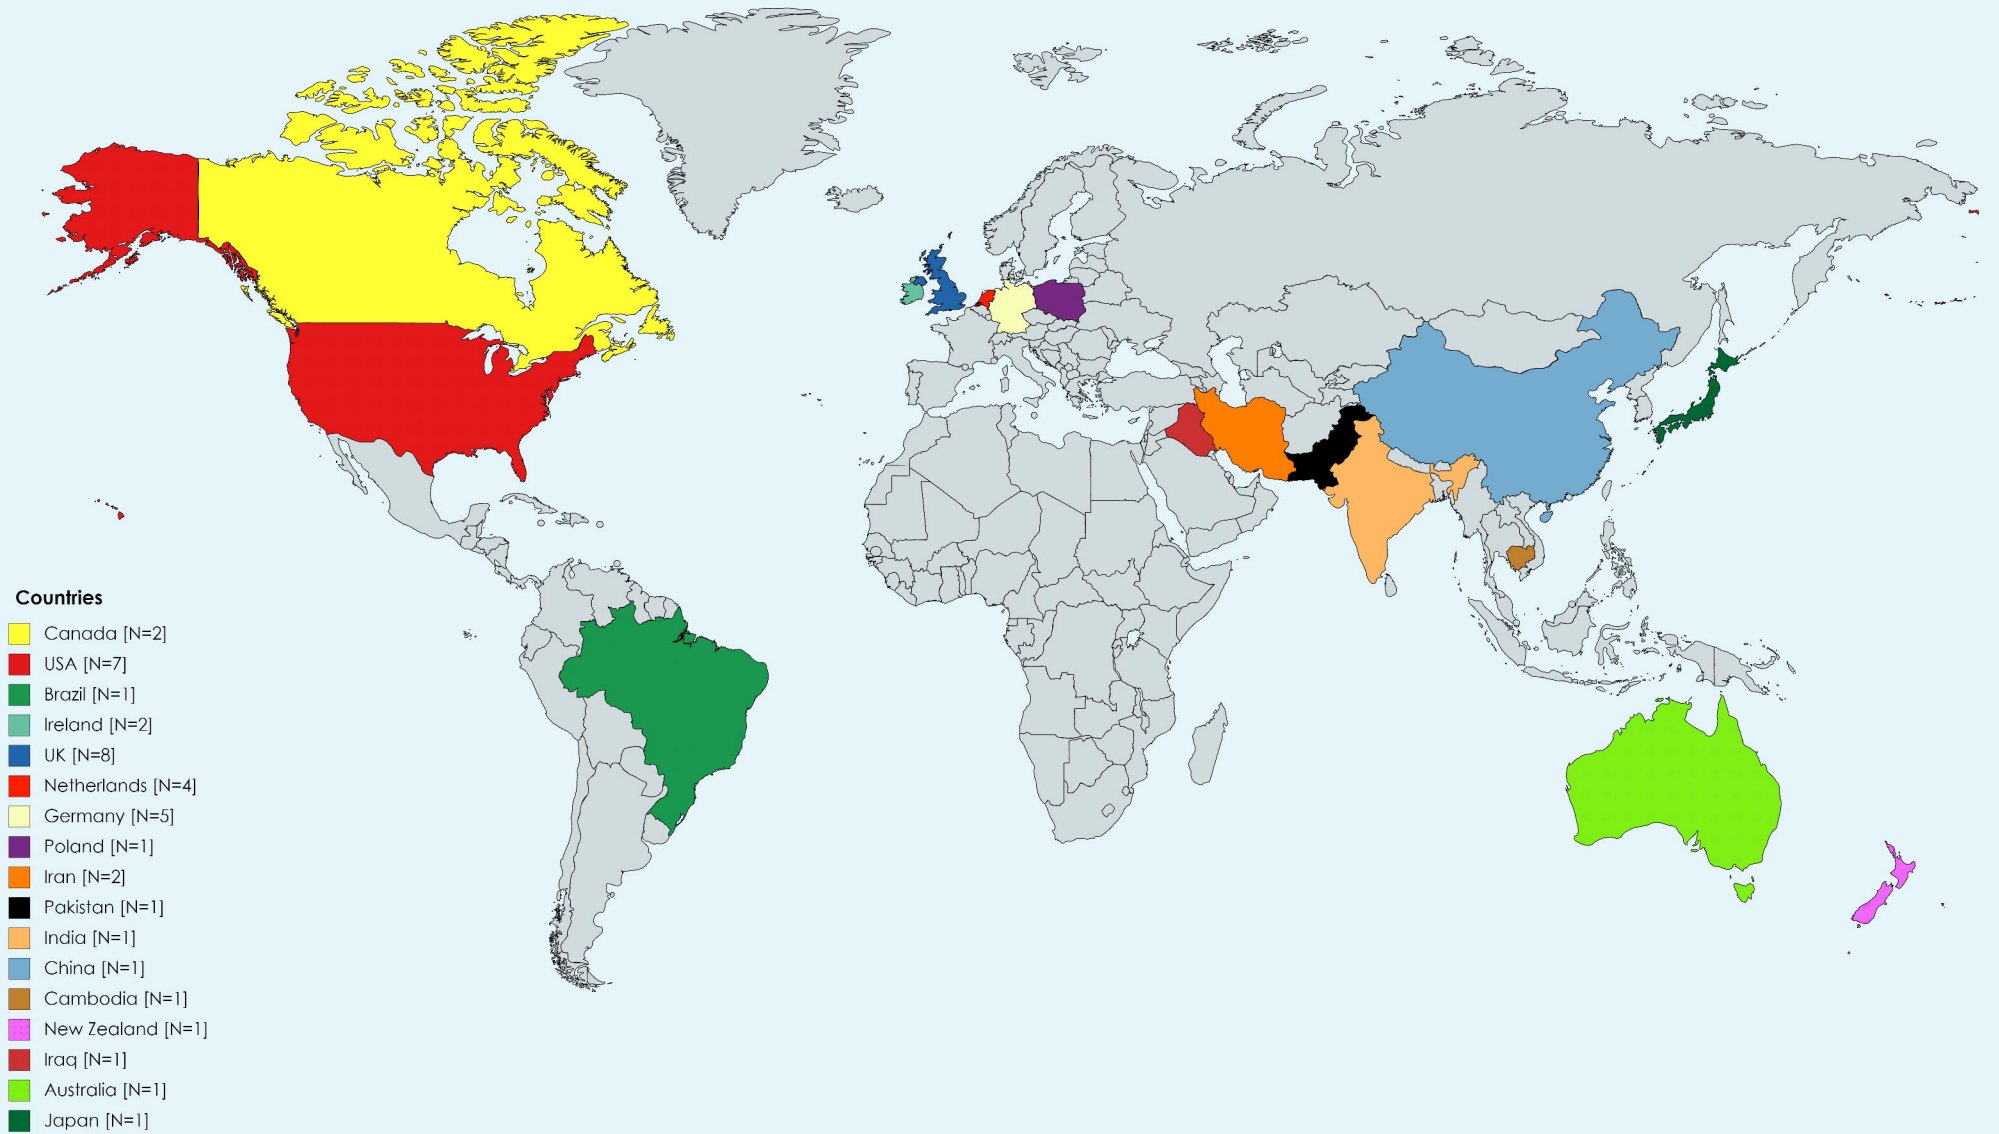

| Studies                                              | Estimate (95% C.I.)         |
|------------------------------------------------------|-----------------------------|
| Ahmed et al., 2017                                   | 0.410 (0.328, 0.492)        |
| Aldington et al., 2014                               | 0.500 (0.359, 0.641)        |
| Bekrater et al., 2015                                | 0.626 (0.609, 0.642)        |
| Bin Ayaz et al., 2015                                | 0.425 (0.366, 0.485)        |
| Bosmans et al., 2007                                 | 0.812 (0.621, 1.000)        |
| Buchanan et al., 1986                                | 0.624 (0.589, 0.660)        |
| Byrne et al., 2011a                                  | 0.690 (0.521, 0.858)        |
| Byrne et al., 2011b                                  | 0.517 (0.335, 0.699)        |
| Clark et al., 2013                                   | 0.863 (0.796, 0.930)        |
| Datta et al., 2004                                   | 0.600 (0.476, 0.724)        |
| Desmond et al., 2010                                 | 0.433 (0.351, 0.514)        |
| Dijkstra et al., 2002                                | 0.720 (0.682, 0.758)        |
| Ehde et al., 2000                                    | 0.722 (0.667, 0.777)        |
| Ephraim et al., 2005                                 | 0.800 (0.774, 0.826)        |
| Gallagher et al., 2001                               | 0.692 (0.604, 0.781)        |
| Hanley et al., 2006                                  | 0.722 (0.667, 0.777)        |
| Hanley et al., 2009                                  | 0.788 (0.710, 0.867)        |
| Hnoosh et al., 2014                                  | 0.610 (0.522, 0.698)        |
| Houghton et al., 1994                                | 0.784 (0.723, 0.845)        |
| Kern et al., 2012                                    | 0.747 (0.710, 0.784)        |
| Ketz et al., 2008                                    | 0.433 (0.351, 0.514)        |
| Kooijman et al., 2000a                               | 0.514 (0.398, 0.629)        |
| Kooijman et al., 2000b                               | 0.018 (0.000, 0.067)        |
| Larbig et al., 2019                                  | 0.750 (0.632, 0.868)        |
| Morgan et al., 2017                                  | 0.481 (0.454, 0.509)        |
| Noguchi et al., 2019                                 | 0.500 (0.352, 0.648)        |
| Penna et al., 2018                                   | 0.531 (0.431, 0.631)        |
| Probstner et al., 2010                               | 0.480 (0.367, 0.593)        |
| Rafferty et al., 2015                                | 0.853 (0.773, 0.933)        |
| Rahimi et al., 2012                                  | 0.669 (0.618, 0.719)        |
| Rayegani et al., 2010                                | 0.642 (0.590, 0.693)        |
| Rasmus et al., 2017                                  | 0.591 (0.385, 0.796)        |
| Reiber et al., 2010a                                 | 0.725 (0.674, 0.776)        |
| Reiber et al., 2010b                                 | 0.763 (0.714, 0.813)        |
| Resnik et al., 2019                                  | 0.761 (0.732, 0.791)        |
| Richardson et al., 2007                              | 0.797 (0.694, 0.899)        |
| Richardson et al., 2015                              | 0.640 (0.541, 0.740)        |
| Schley et al., 2008                                  | 0.446 (0.325, 0.567)        |
| Wartan et al., 1997                                  | 0.622 (0.580, 0.663)        |
| Yin et al., 2017                                     | 0.292 (0.247, 0.337)        |
| <b>Overall (I<sup>2</sup>=97.51 % , P&lt; 0.001)</b> | <b>0.624 (0.571, 0.677)</b> |

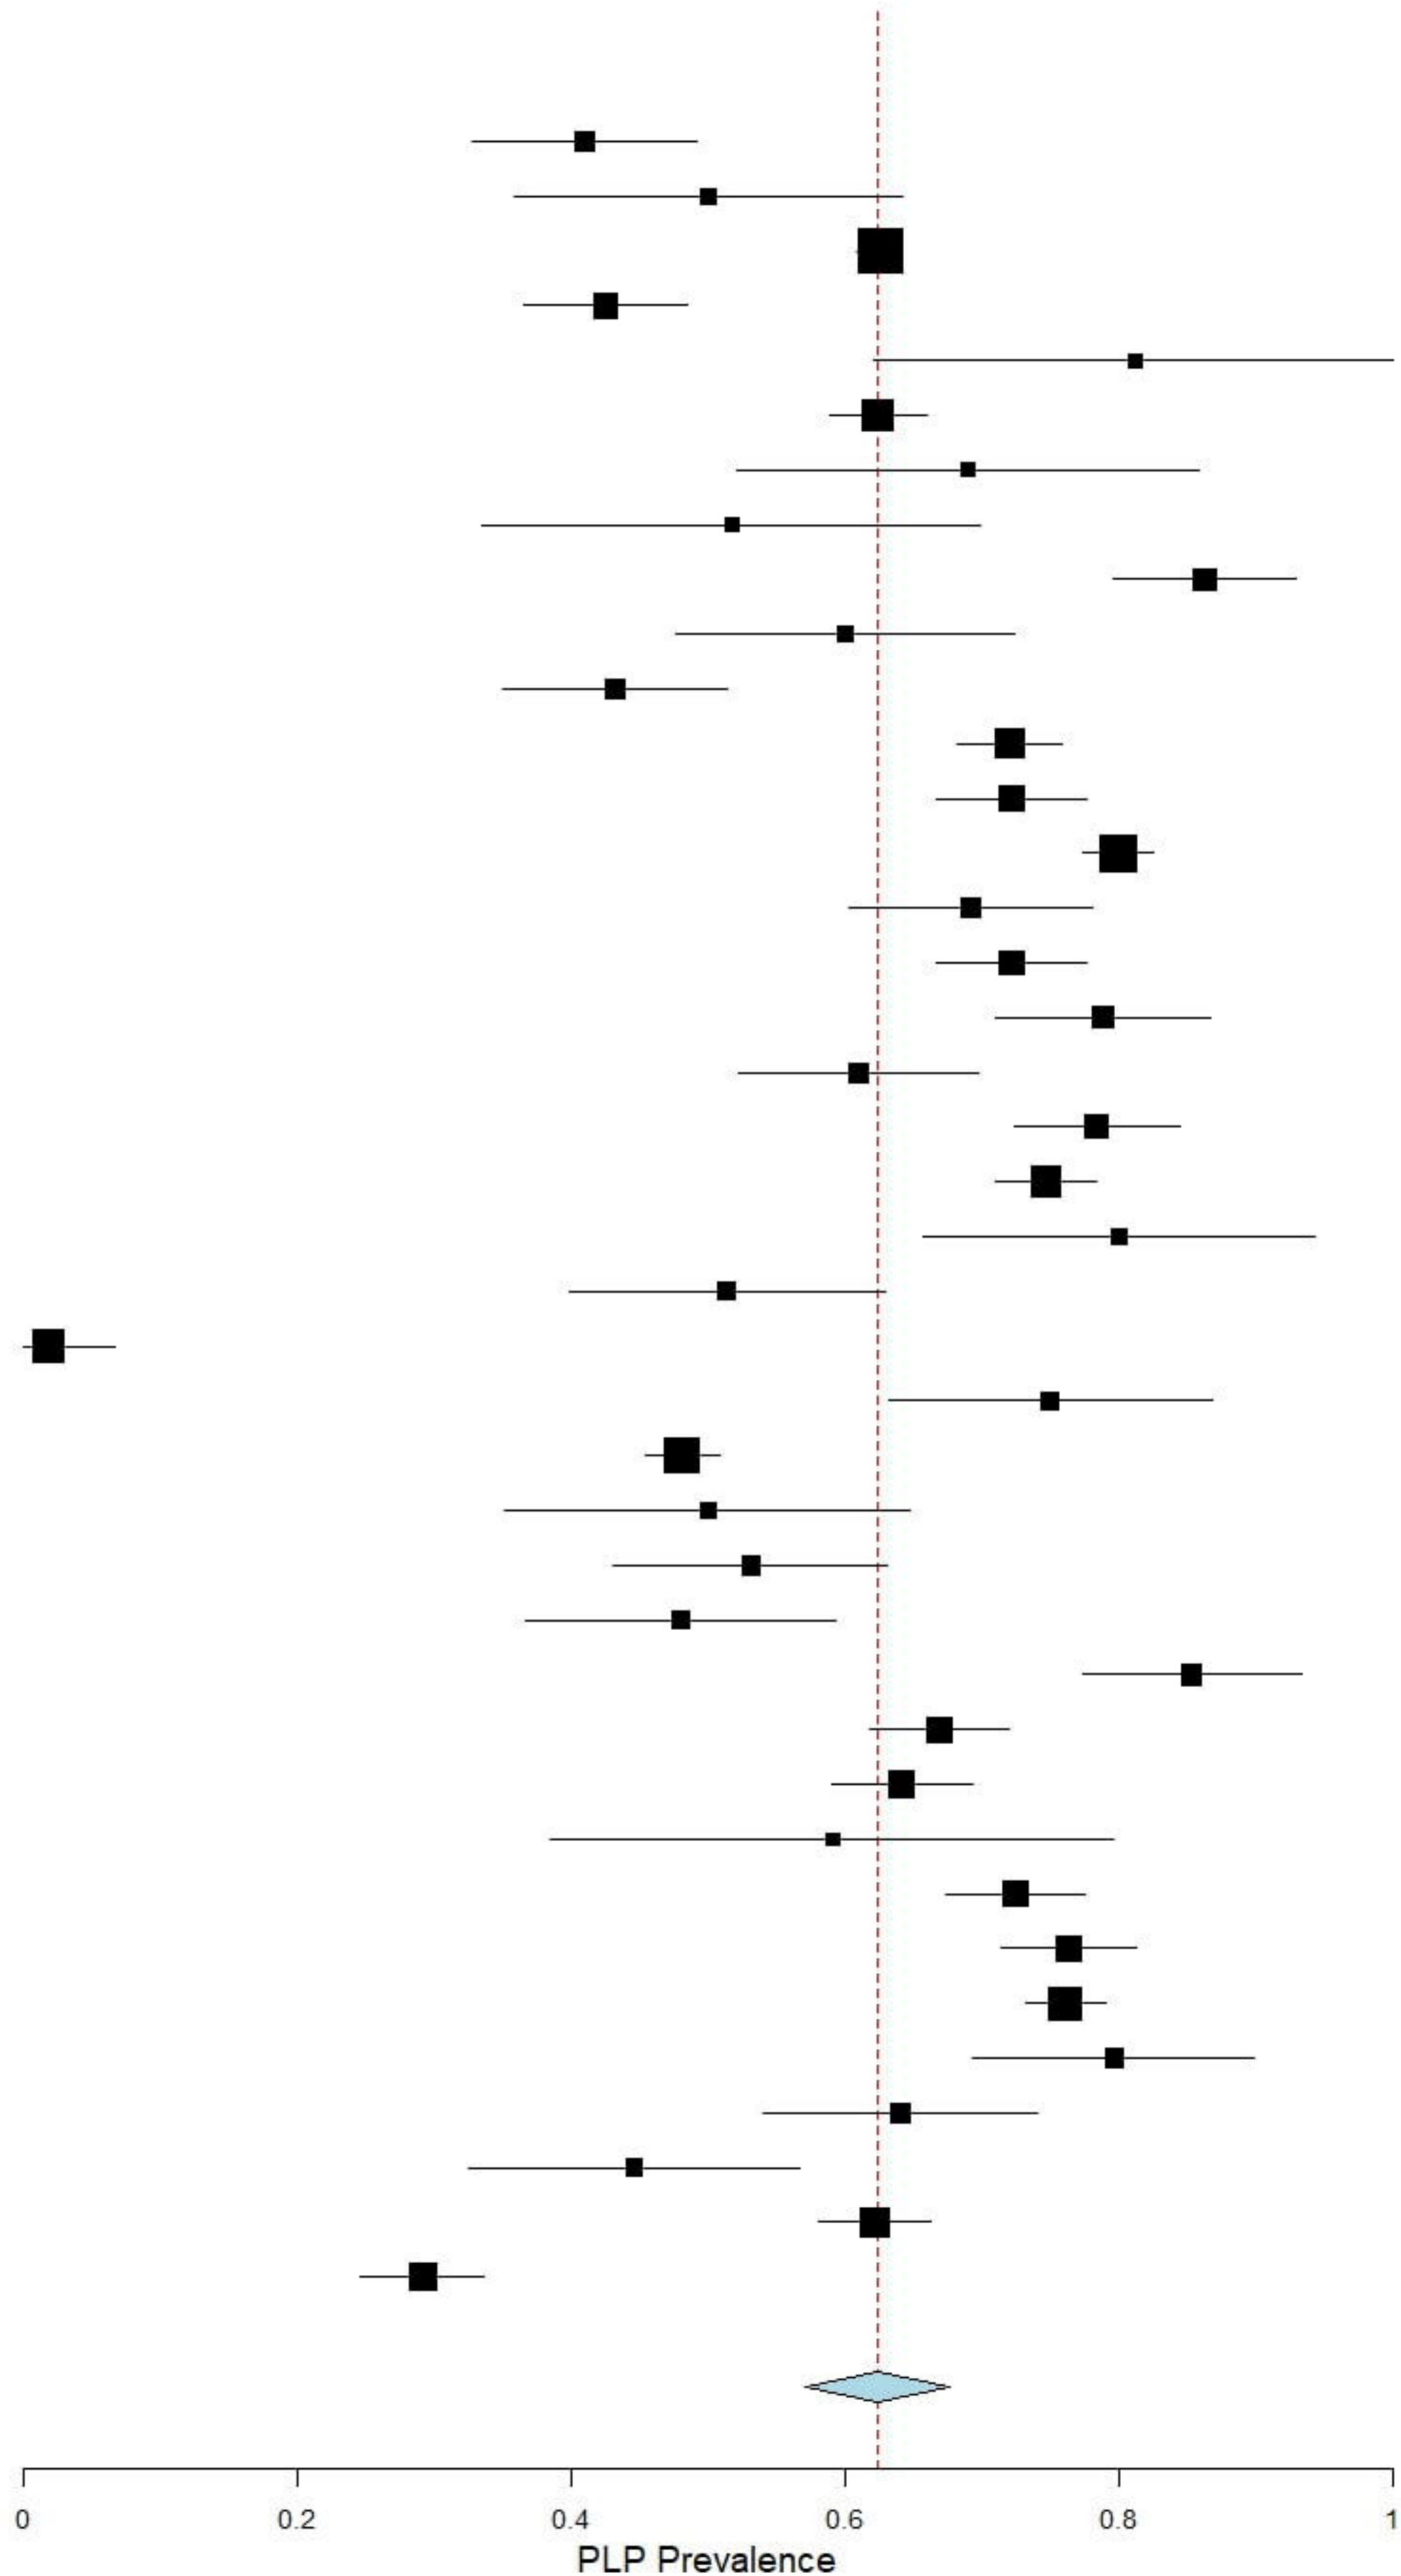

medRxiv preprint doi: <https://doi.org/10.1101/19008961>; this version posted October 18, 2019. The copyright holder for this preprint (which was not certified by peer review) is the author/funder, who has granted medRxiv a license to display the preprint in perpetuity. It is made available under a [CC-BY-NC-ND 4.0 International license](https://creativecommons.org/licenses/by-nc-nd/4.0/).

**Studies**

Estimate (95% C.I.)

Aldington et al., 2014

0.500 (0.359, 0.641)

Hnoosh et al., 2014

0.610 (0.522, 0.698)

Rahimi et al., 2012

0.669 (0.618, 0.719)

Rayegani et al., 2010

0.642 (0.590, 0.693)

**Overall ( $I^2=44.91\%$  ,  $P=0.142$ )****0.631 (0.583, 0.679)**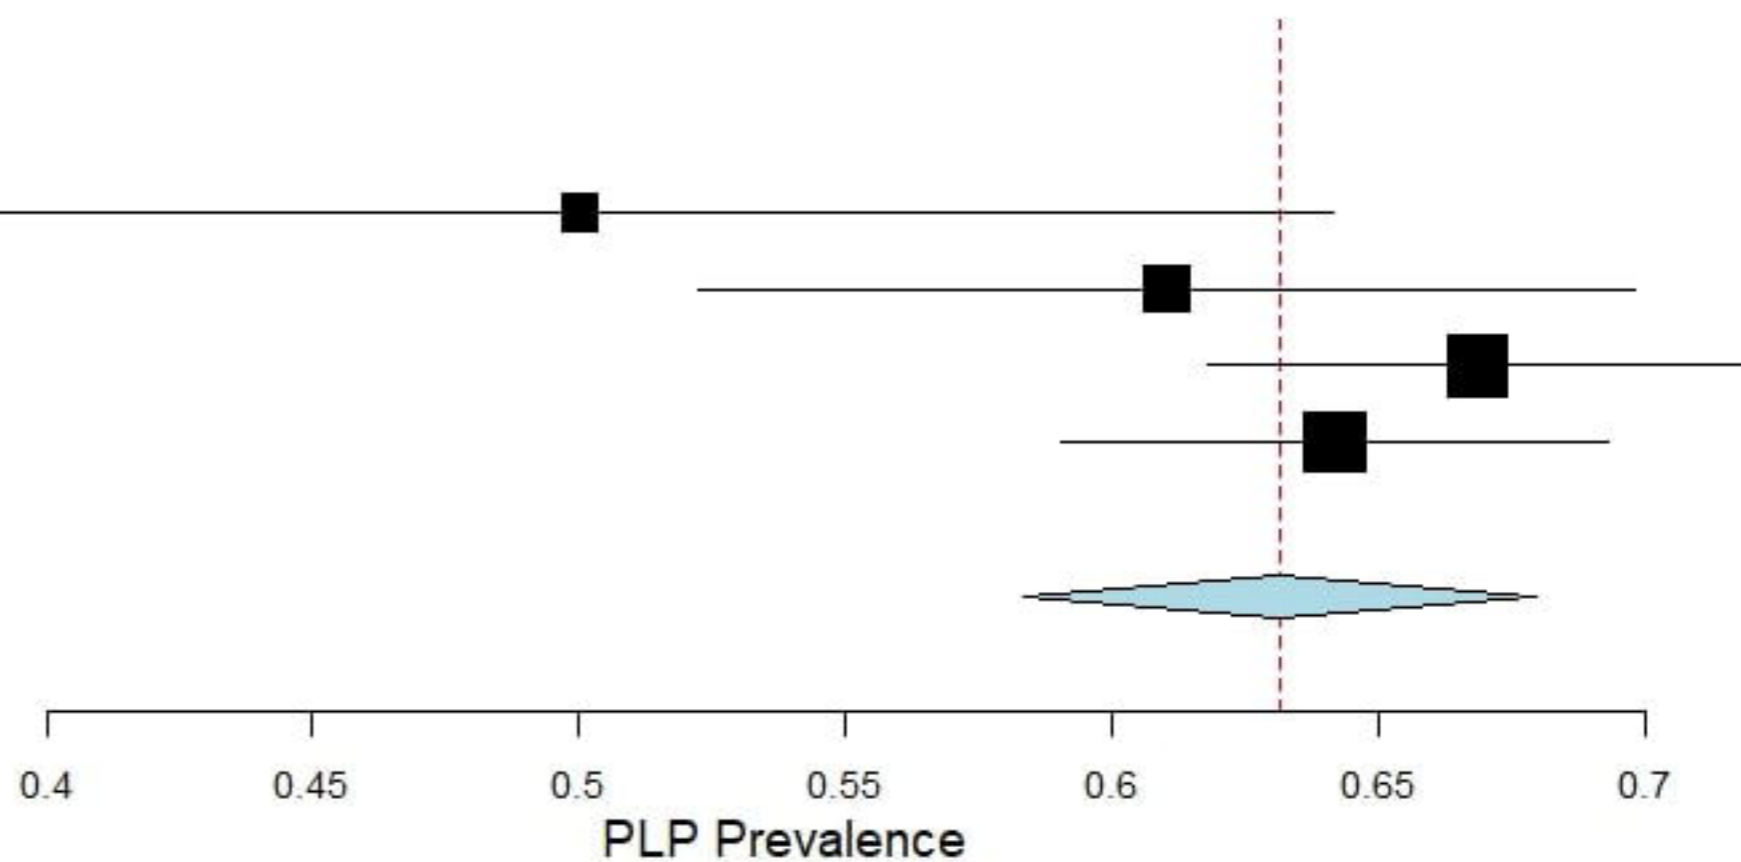

| Studies                                              | Estimate (95% C.I.)         |
|------------------------------------------------------|-----------------------------|
| Ahmed et al., 2017                                   | 0.410 (0.328, 0.492)        |
| Bekrater et al., 2015                                | 0.626 (0.609, 0.642)        |
| Bin Ayaz et al., 2015                                | 0.425 (0.366, 0.485)        |
| Bosmans et al., 2007                                 | 0.812 (0.621, 1.000)        |
| Buchanan et al., 1986                                | 0.624 (0.589, 0.660)        |
| Byrne et al., 2011a                                  | 0.690 (0.521, 0.858)        |
| Byrne et al., 2011b                                  | 0.517 (0.335, 0.699)        |
| Clark et al., 2013                                   | 0.863 (0.796, 0.930)        |
| Datta et al., 2004                                   | 0.600 (0.476, 0.724)        |
| Desmond et al., 2010                                 | 0.433 (0.351, 0.514)        |
| Dijkstra et al., 2002                                | 0.720 (0.682, 0.758)        |
| Ehde et al., 2000                                    | 0.722 (0.667, 0.777)        |
| Ephraim et al., 2005                                 | 0.800 (0.774, 0.826)        |
| Gallagher et al., 2001                               | 0.692 (0.604, 0.781)        |
| Hanley et al., 2006                                  | 0.722 (0.667, 0.777)        |
| Hanley et al., 2009                                  | 0.788 (0.710, 0.867)        |
| Houghton et al., 1994                                | 0.825 (0.725, 0.845)        |
| Kern et al., 2012                                    | 0.747 (0.710, 0.784)        |
| Ketz et al., 2008                                    | 0.800 (0.657, 0.943)        |
| Kooijman et al., 2000a                               | 0.514 (0.398, 0.629)        |
| Kooijman et al., 2000b                               | 0.018 (0.000, 0.067)        |
| Larbig et al., 2019                                  | 0.750 (0.632, 0.868)        |
| Morgan et al., 2017                                  | 0.481 (0.454, 0.509)        |
| Noguchi et al., 2019                                 | 0.500 (0.352, 0.648)        |
| Penna et al., 2018                                   | 0.531 (0.431, 0.631)        |
| Probstner et al., 2010                               | 0.480 (0.367, 0.593)        |
| Rafferty et al., 2015                                | 0.853 (0.773, 0.933)        |
| Rasmus et al., 2017                                  | 0.591 (0.385, 0.796)        |
| Reiber et al., 2010a                                 | 0.725 (0.674, 0.776)        |
| Reiber et al., 2010b                                 | 0.763 (0.714, 0.813)        |
| Resnik et al., 2019                                  | 0.761 (0.732, 0.791)        |
| Richardson et al., 2007                              | 0.797 (0.694, 0.899)        |
| Richardson et al., 2015                              | 0.640 (0.541, 0.740)        |
| Schley et al., 2008                                  | 0.446 (0.325, 0.567)        |
| Wartan et al., 1997                                  | 0.622 (0.580, 0.663)        |
| Yin et al., 2017                                     | 0.292 (0.247, 0.337)        |
| <b>Overall (I<sup>2</sup>=97.75 % , P&lt; 0.001)</b> | <b>0.626 (0.568, 0.684)</b> |

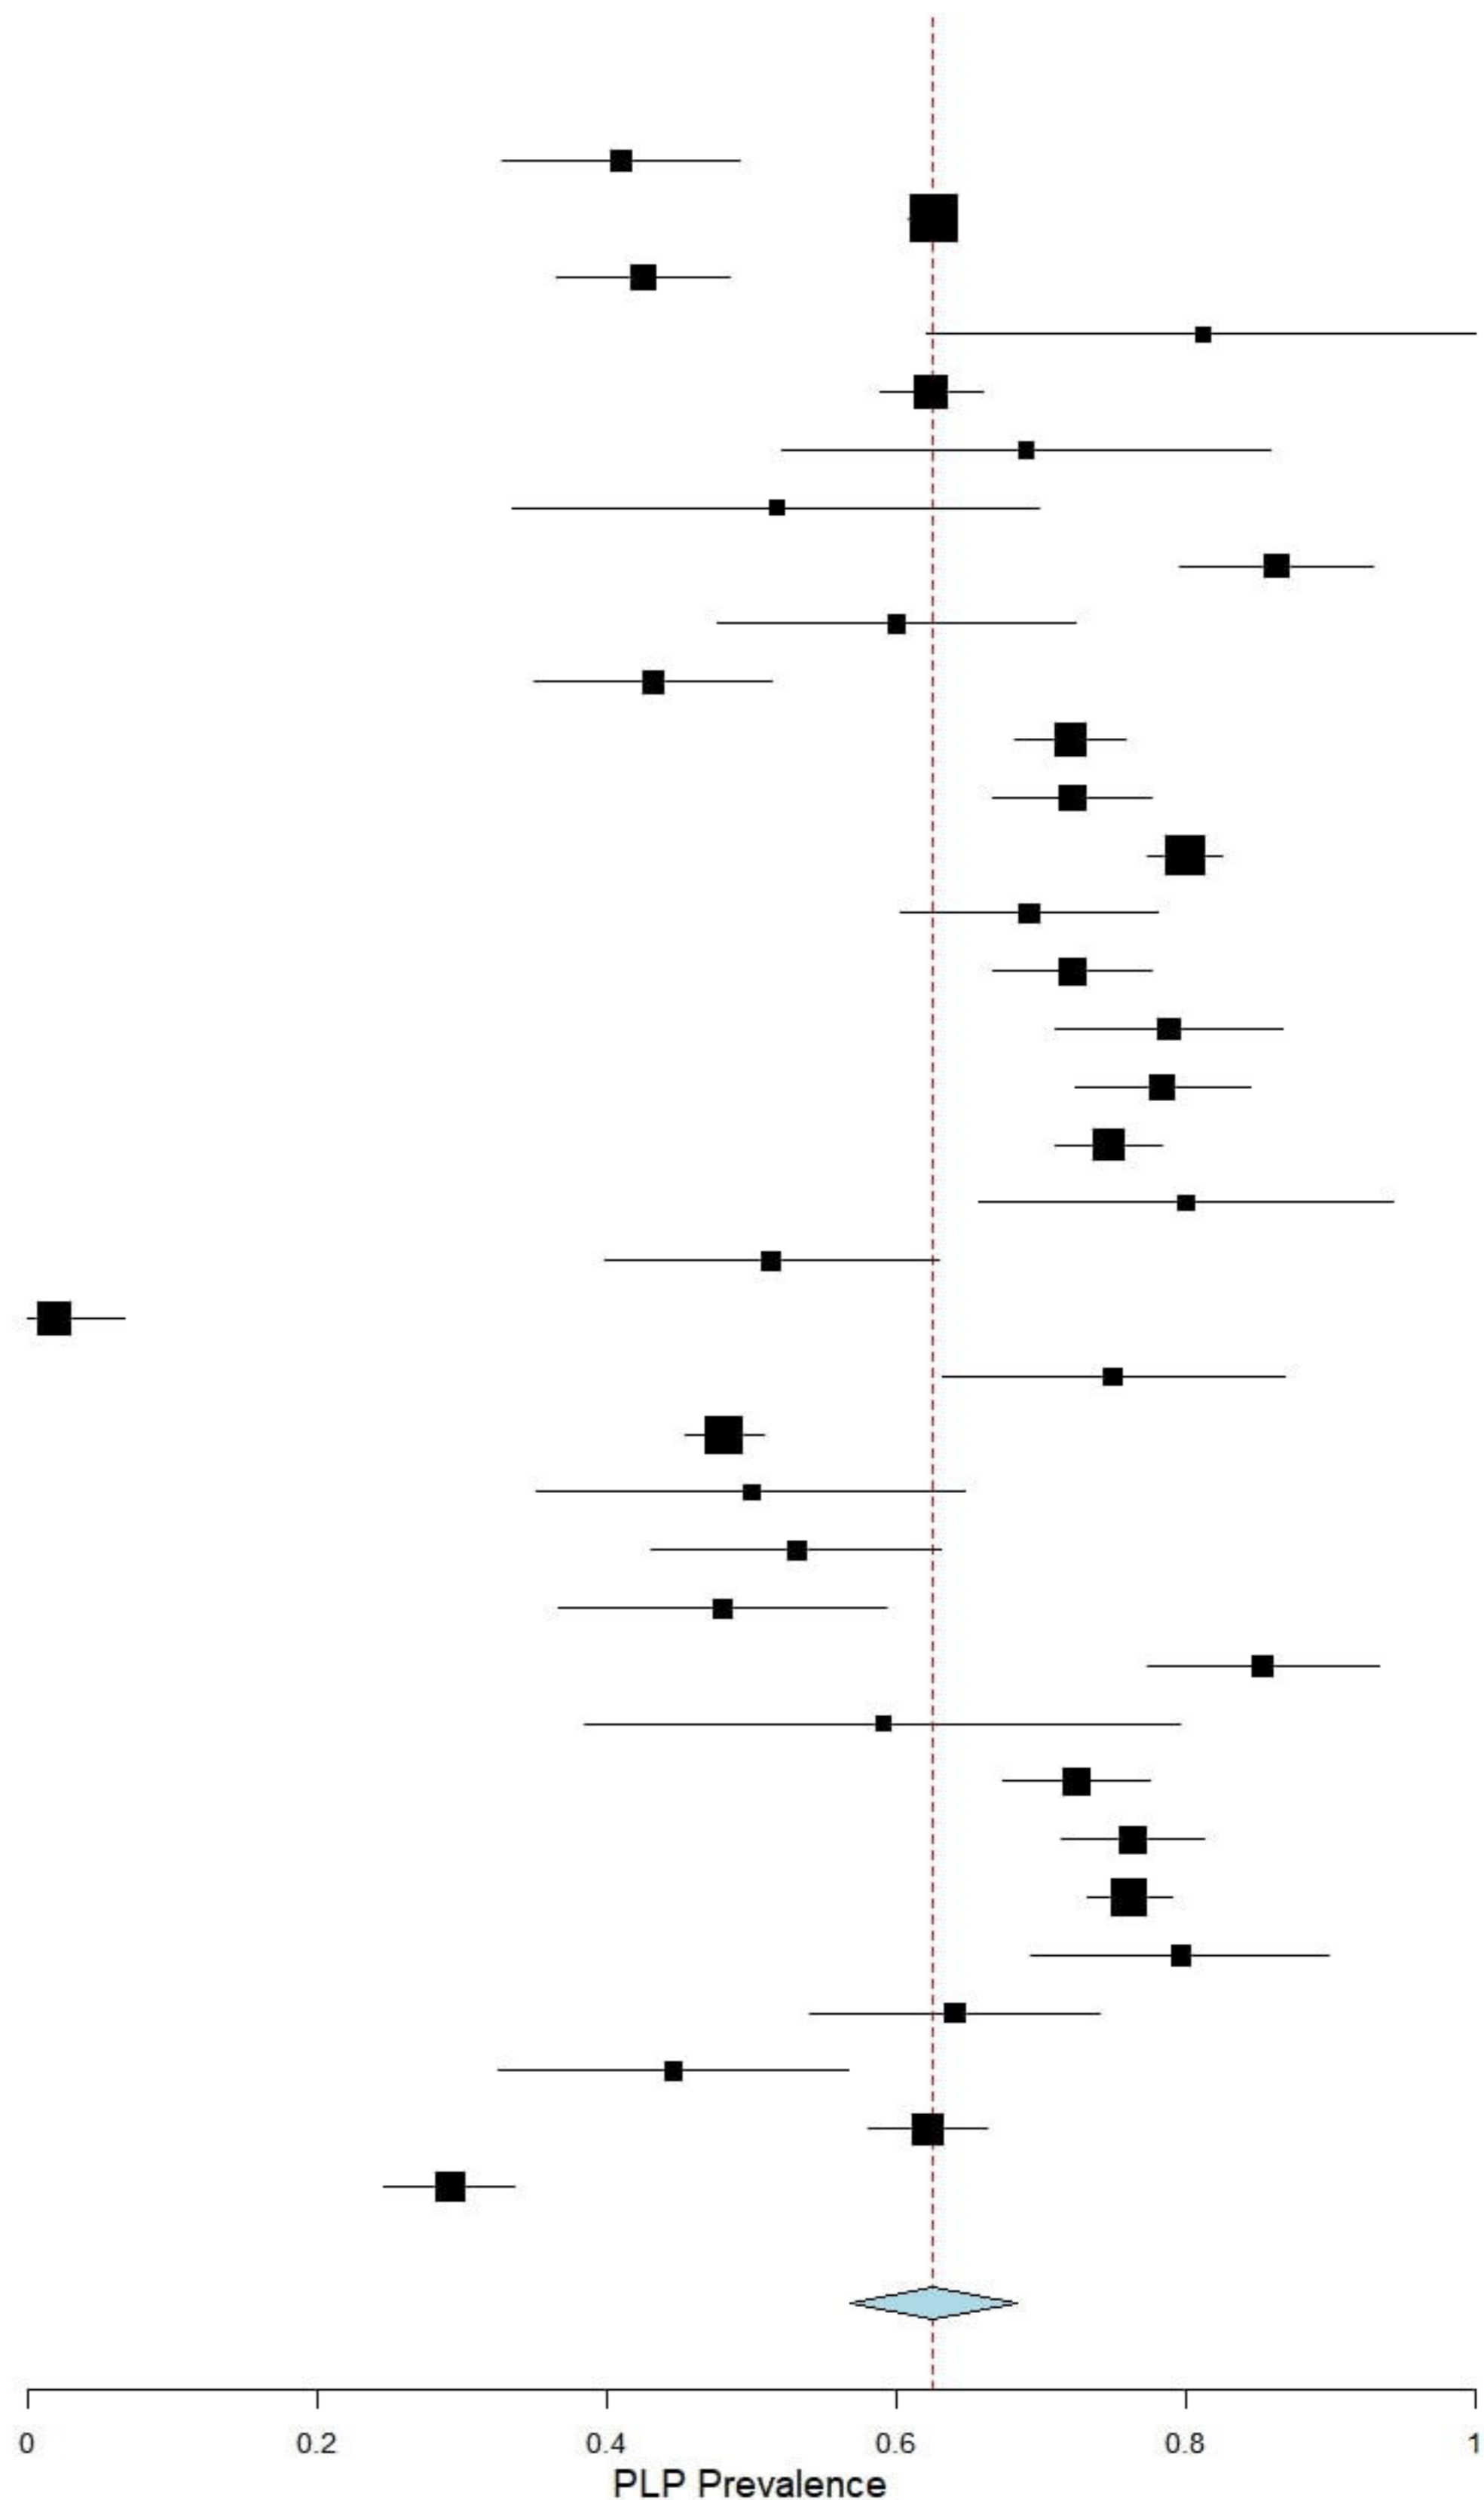

**Studies** Estimate (95% C.I.)

|                         |       |                |
|-------------------------|-------|----------------|
| Aldington et al., 2014  | 0.500 | (0.359, 0.641) |
| Bekrater et al., 2015   | 0.626 | (0.609, 0.642) |
| Bosmans et al., 2007    | 0.812 | (0.621, 1.000) |
| Buchanan et al., 1986   | 0.624 | (0.589, 0.660) |
| Byrne et al., 2011a     | 0.690 | (0.521, 0.858) |
| Clark et al., 2013      | 0.863 | (0.796, 0.930) |
| Datta et al., 2004      | 0.600 | (0.476, 0.724) |
| Desmond et al., 2010    | 0.433 | (0.351, 0.514) |
| Dijkstra et al., 2002   | 0.720 | (0.682, 0.758) |
| Ehde et al., 2000       | 0.722 | (0.667, 0.777) |
| Ephraim et al., 2005    | 0.800 | (0.774, 0.826) |
| Gallagher et al., 2001  | 0.692 | (0.604, 0.781) |
| Hanley et al., 2006     | 0.722 | (0.667, 0.777) |
| Hanley et al., 2009     | 0.710 | (0.667, 0.767) |
| Houghton et al., 1994   | 0.784 | (0.723, 0.845) |
| Kern et al., 2012       | 0.747 | (0.710, 0.784) |
| Ketz et al., 2008       | 0.800 | (0.657, 0.943) |
| Kooijman et al., 2000a  | 0.514 | (0.398, 0.629) |
| Kooijman et al., 2000b  | 0.018 | (0.000, 0.067) |
| Larbig et al., 2019     | 0.750 | (0.632, 0.868) |
| Morgan et al., 2017     | 0.481 | (0.454, 0.509) |
| Noguchi et al., 2019    | 0.500 | (0.352, 0.648) |
| Penna et al., 2018      | 0.531 | (0.431, 0.631) |
| Rafferty et al., 2015   | 0.853 | (0.773, 0.933) |
| Rasmus et al., 2017     | 0.591 | (0.385, 0.796) |
| Reiber et al., 2010a    | 0.725 | (0.674, 0.776) |
| Reiber et al., 2010b    | 0.763 | (0.714, 0.813) |
| Resnik et al., 2019     | 0.761 | (0.732, 0.791) |
| Richardson et al., 2007 | 0.797 | (0.694, 0.899) |
| Richardson et al., 2015 | 0.640 | (0.541, 0.740) |
| Schley et al., 2008     | 0.446 | (0.325, 0.567) |
| Wartan et al., 1997     | 0.622 | (0.580, 0.663) |
| Yin et al., 2017        | 0.292 | (0.247, 0.337) |

**Overall (I<sup>2</sup>=97.83 % , P< 0.001)** 0.642 (0.583, 0.702)

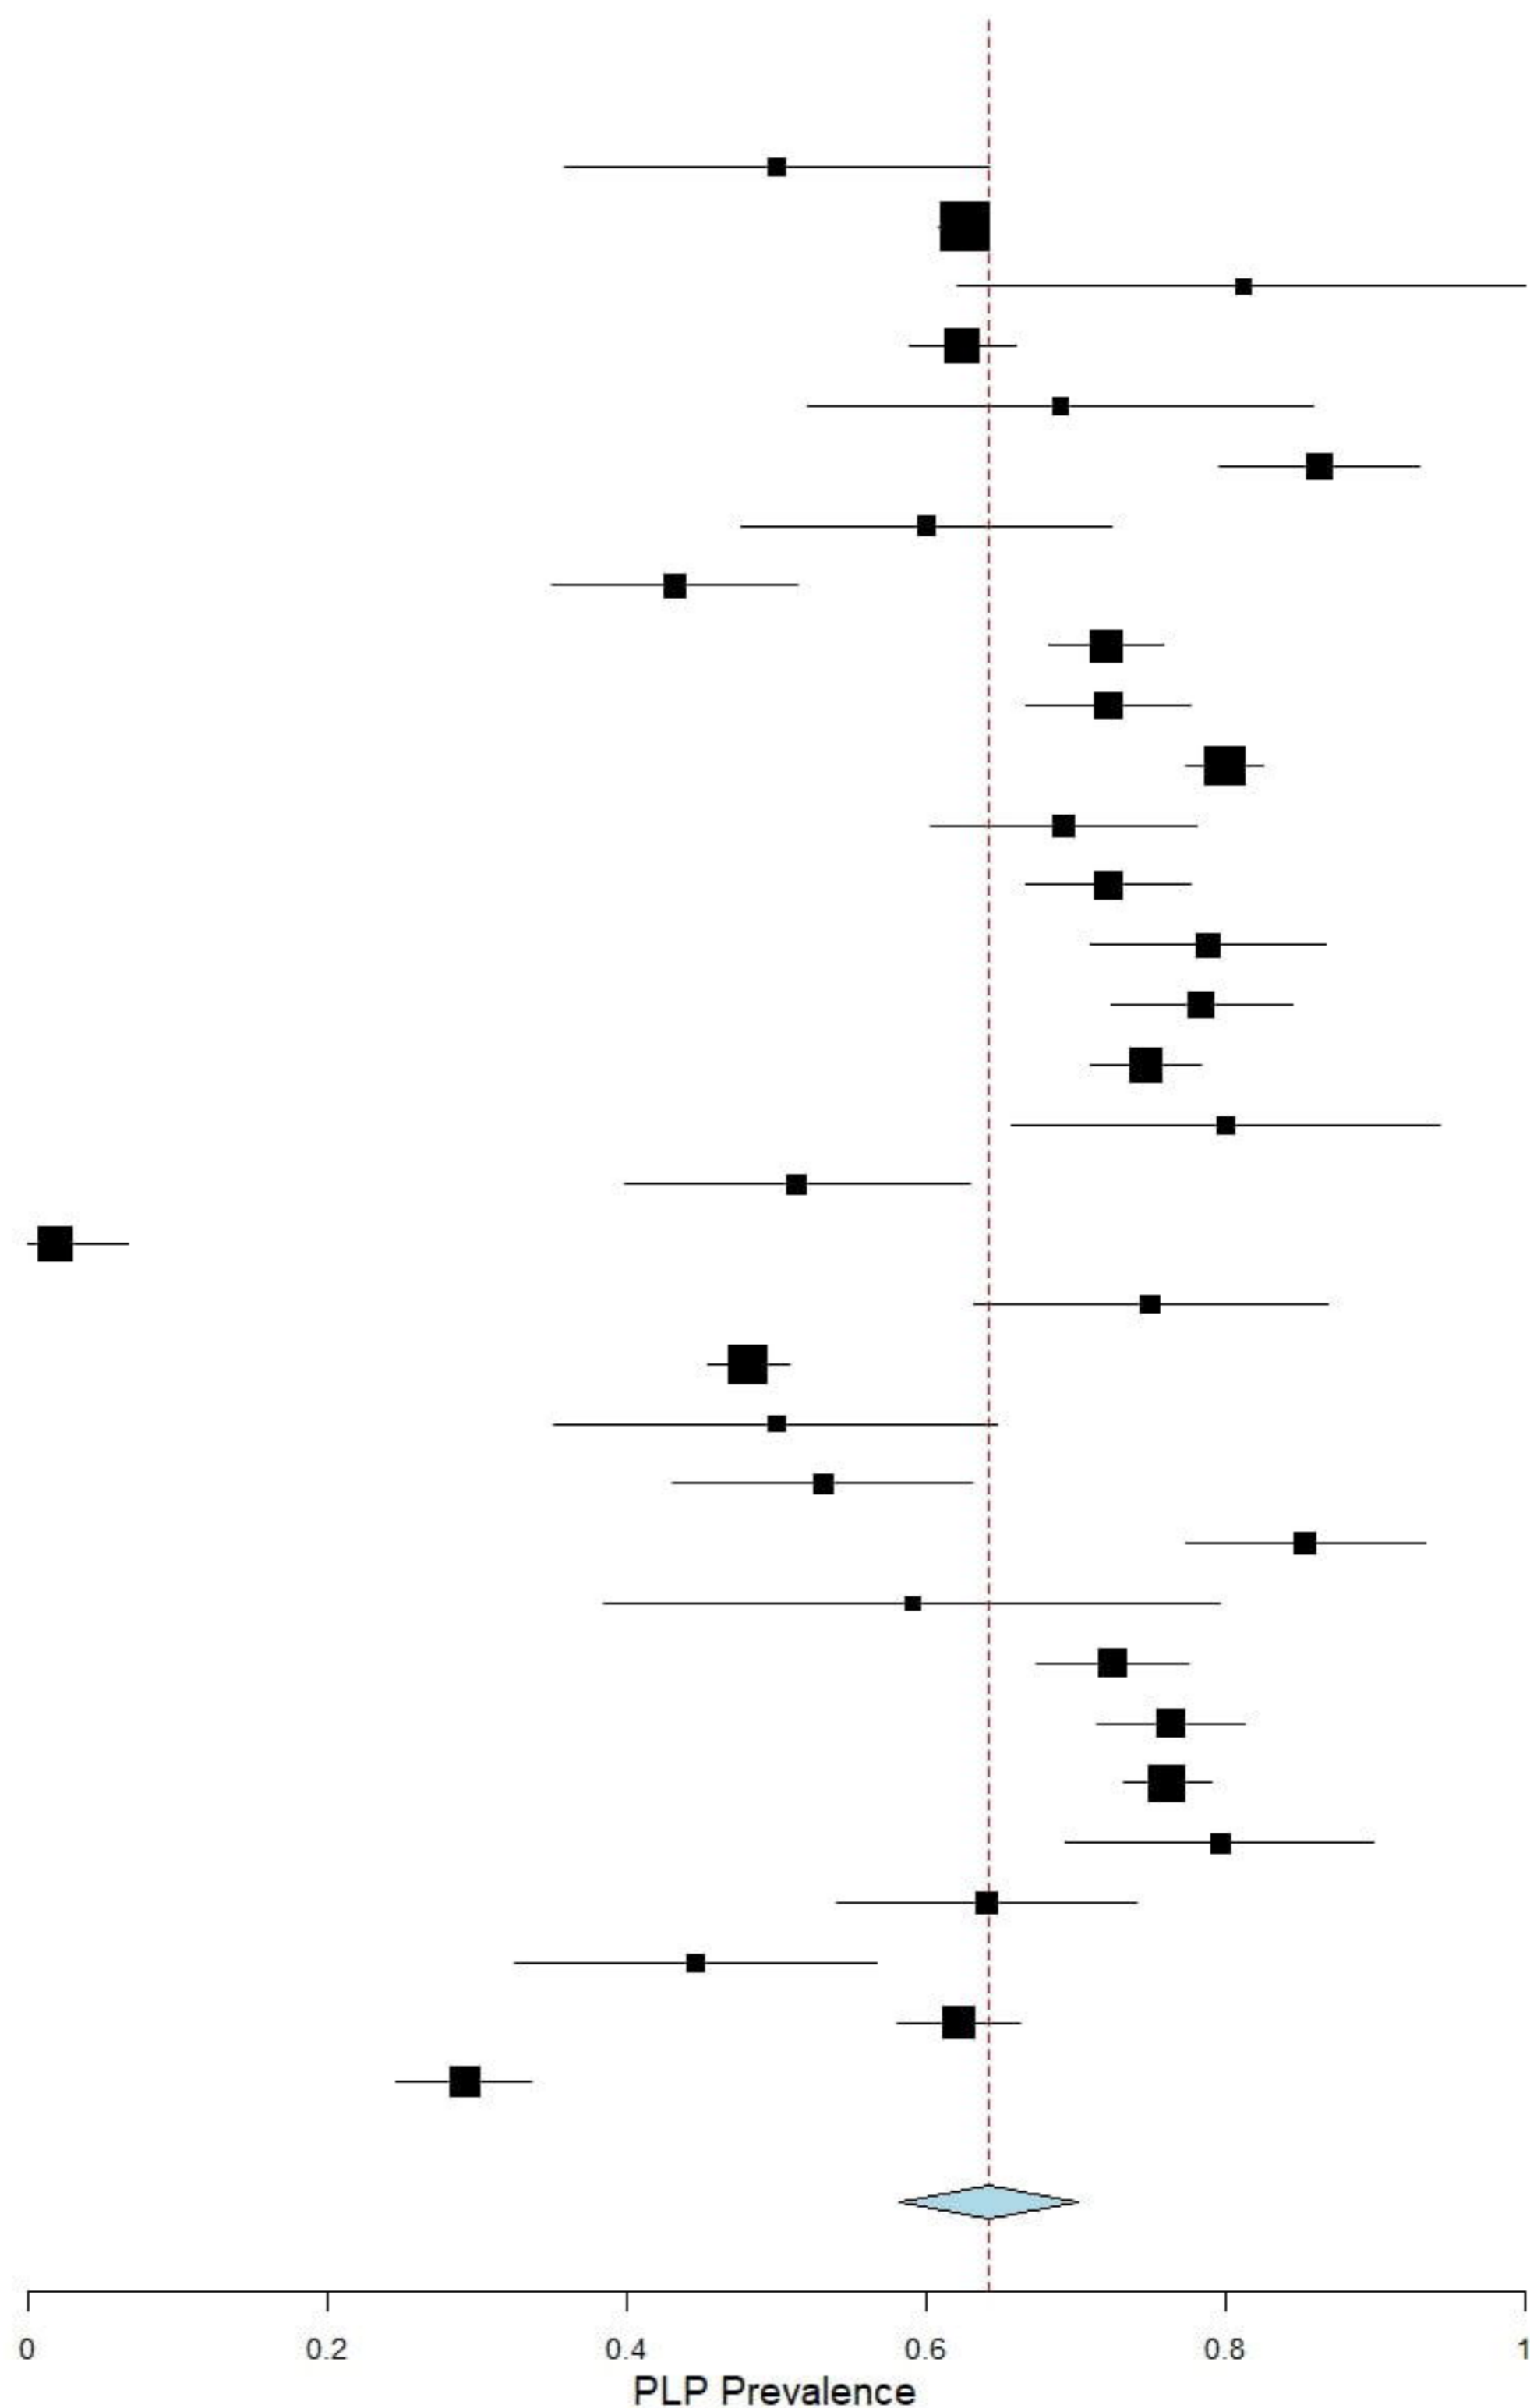

**Studies**

Estimate (95% C.I.)

Ahmed et al., 2017 0.410 (0.328, 0.492)

Bin Ayaz et al., 2015 0.425 (0.366, 0.485)

Byrne et al.,b 2011 0.517 (0.335, 0.699)

Hnoosh et al., 2014 0.610 (0.522, 0.698)

Probstner et al., 2010 0.480 (0.367, 0.593)

Rahimi et al., 2012 0.669 (0.618, 0.719)

Rayegani et al., 2010 0.642 (0.590, 0.693)

**Overall ( $I^2=90.54\%$  ,  $P<0.001$ ) 0.539 (0.448, 0.631)**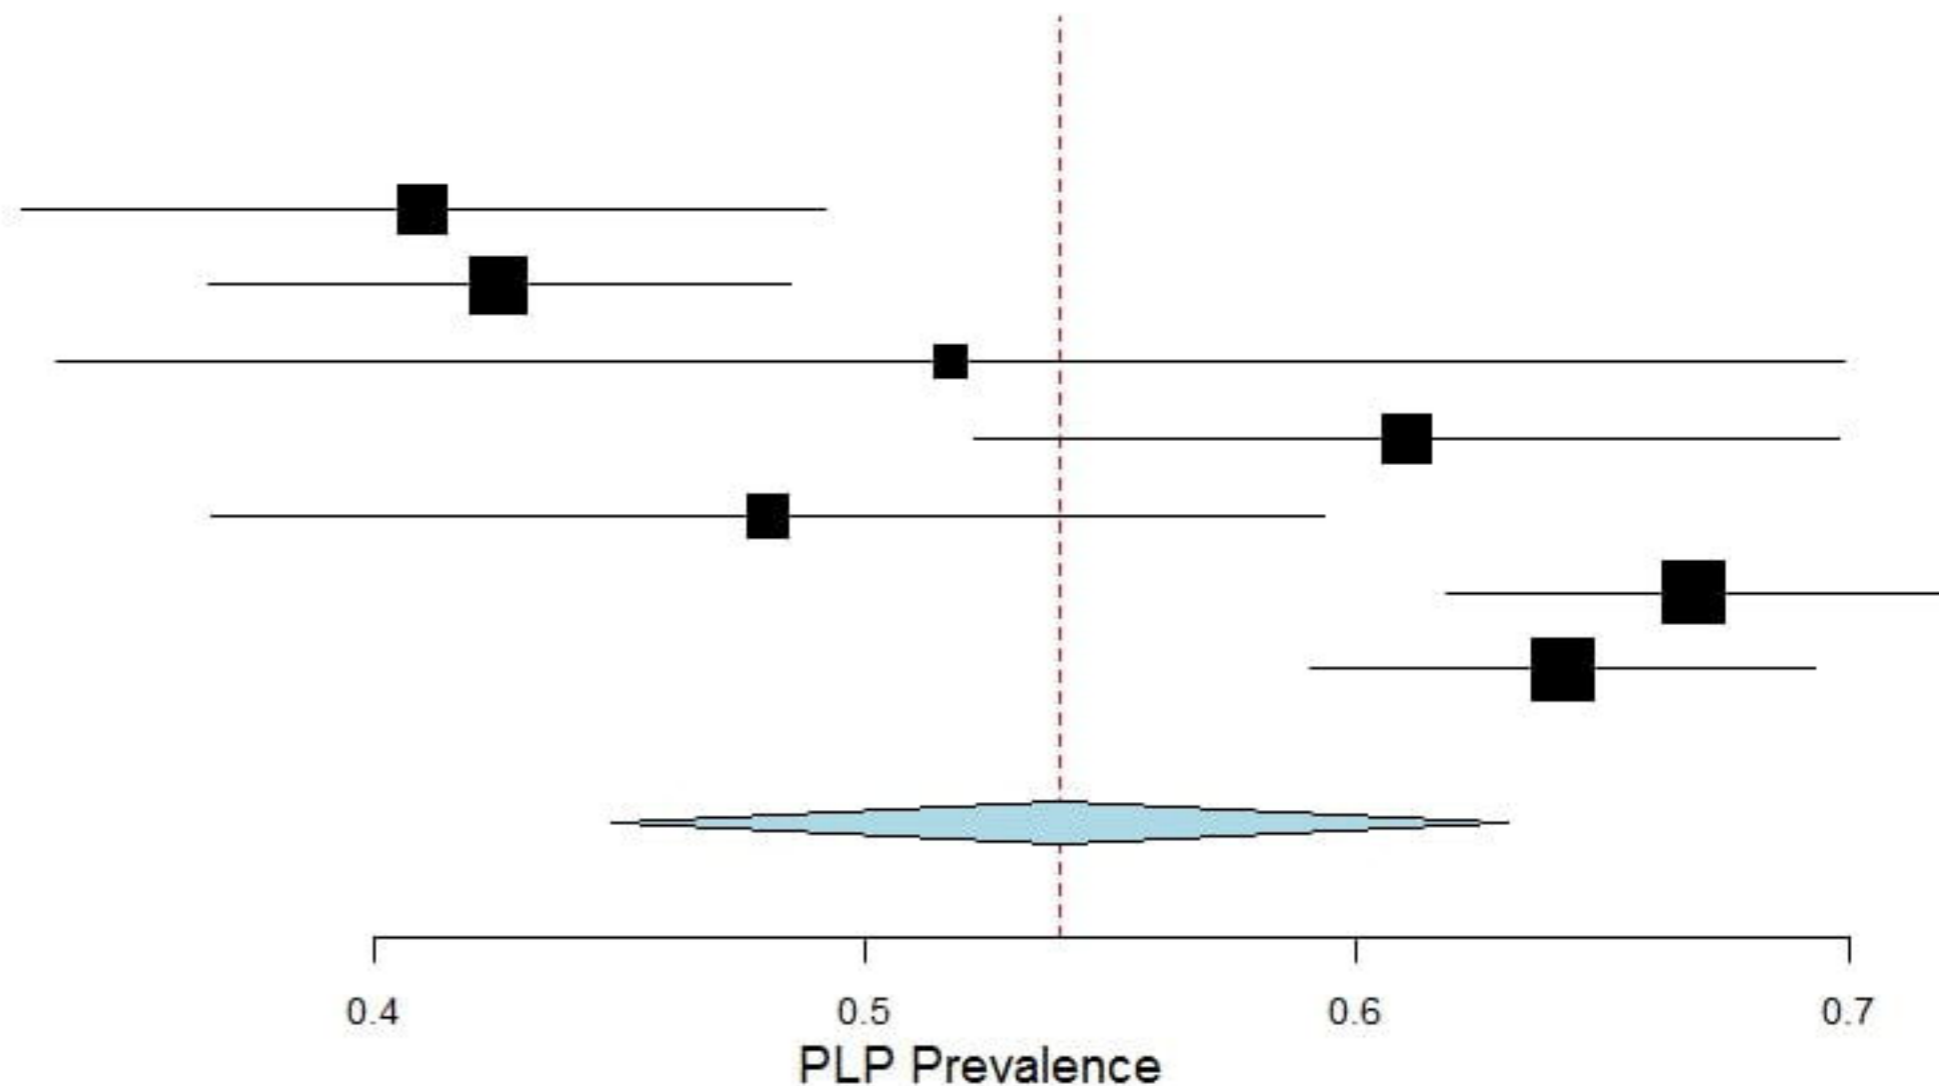



# Bias assessment plot

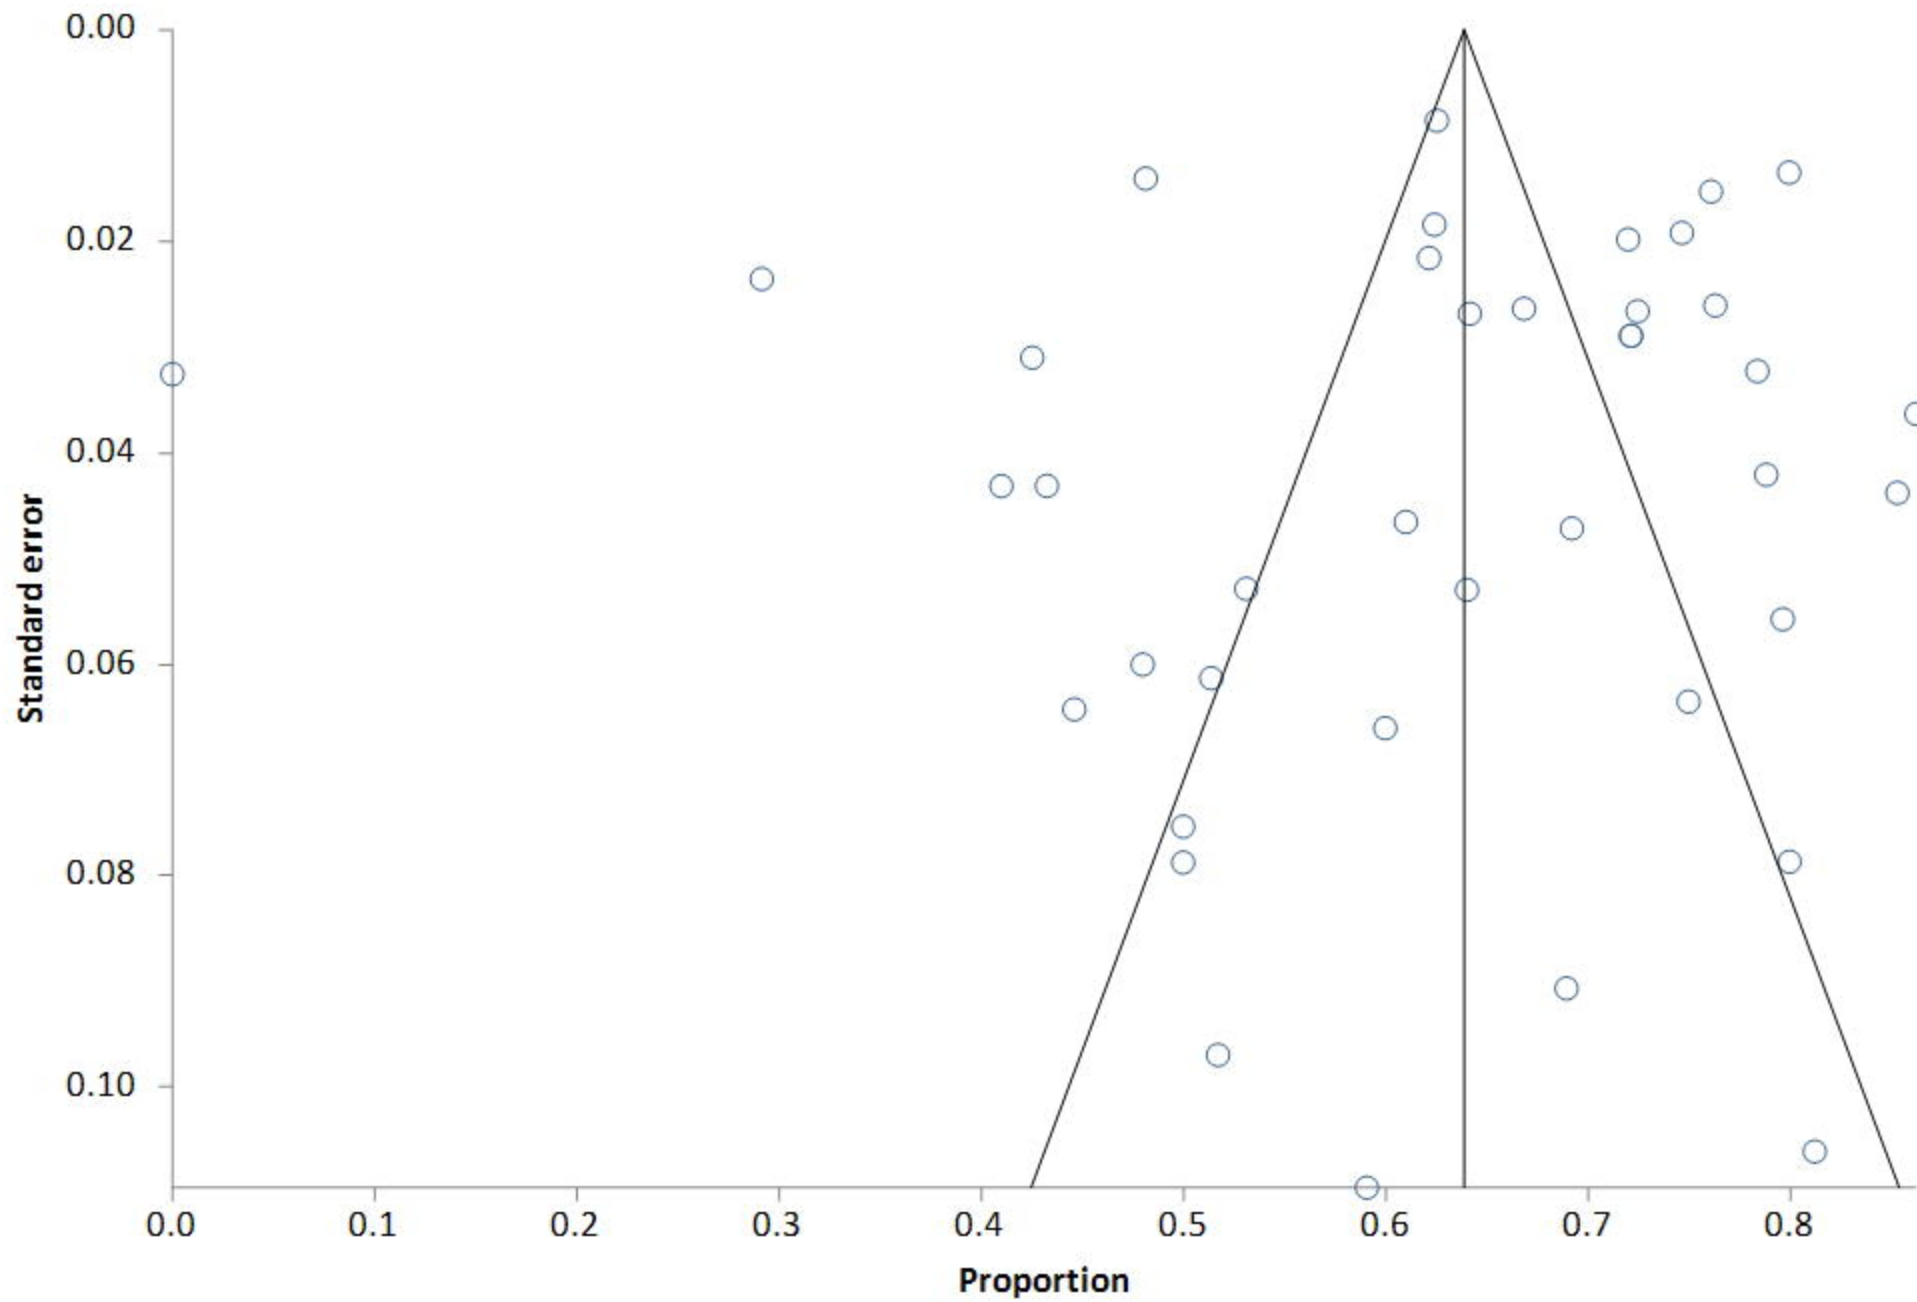

| Authors                         | Study type      | Country of study | Development status | Method of data collection          | Sample size | Age Mean (SD) | Sex M/F  | Level of amputation (UL/LL) | PLP prevalence (%) |
|---------------------------------|-----------------|------------------|--------------------|------------------------------------|-------------|---------------|----------|-----------------------------|--------------------|
| Ahmed et al., 2017              | Cross-sectional | India            | Developing         | Self-reported questionnaire        | 139         | 38.23 (1.54)  | 102/37   | 36/103                      | 41                 |
| Aldington et al., 2014          | Cross-sectional | UK               | Developed          | Self-reported questionnaire        | 48          | 28.8 (6.7)    | -        | 11/54                       | 49                 |
| Bekrater et al., 2015           | Cross-sectional | Germany          | Developed          | Postal and telephone questionnaire | 3234        | 64.37 (15.89) | 2637/597 | 824/2410                    | 62.55              |
| Bin Ayaz et al., 2015           | Cross-sectional | Pakistan         | Developing         | Face-to-face interview             | 268         | 28 (6)        | 266/2    | 35/233                      | 42.5               |
| Bosmans et al., 2007            | Cross-sectional | Netherlands      | Developed          | Face-to-face interview             | 16          | 66.5 (39-86)* | 11/5     | 0/16                        | 81.25              |
| Buchanan et al., 1986           | Cross-sectional | Canada           | Developed          | Face-to-face interview             | 716         | -             | 616/100  | 43/647                      | 62.4               |
| Byrne et al., 2011 <sup>a</sup> | Cross-sectional | New Zealand      | Developed          | Face-to-face interview             | 29          | 41.7 (4.8)    | 25/4     | 7/24                        | 69                 |
| Byrne et al., 2011 <sup>b</sup> | Cross-sectional | Cambodia         | Developing         | Face-to-face interview             | 29          | 40.3 (10.5)   | 25/4     | 1/28                        | 51.7               |
| Clark et al., 2013              | Cross-sectional | UK               | Developed          | Postal and telephone questionnaire | 102         | 70.9 (1.27)   | -        | 0/97                        | 85.6               |
| Datta et al., 2004              | Cohort          | UK               | Developed          | Postal questionnaire               | 60          | 58.1 (-)      | 48/12    | 60/0                        | 60                 |
| Desmond et al., 2010            | Cross-sectional | Ireland          | Developed          | Self-reported questionnaire        | 141         | 74.8 (-)      | 138/3    | 141/0                       | 42.6               |
| Dijkstra et al., 2002           | Cross-sectional | Netherlands      | Developed          | Postal questionnaire               | 536         | -             | 367/150  | 99/433                      | 72                 |
| Ehde et al., 2000               | Cross-sectional | USA              | Developed          | Postal questionnaire               | 255         | 55.1 (14.3)   | 207/48   | 0/255                       | 72                 |

|                                    |                 |             |            |                                                        |      |                |         |         |      |
|------------------------------------|-----------------|-------------|------------|--------------------------------------------------------|------|----------------|---------|---------|------|
| Ephraim et al., 2005               | Cross-sectional | USA         | Developed  | telephone interview                                    | 914  | 50.3 (13.3)    | 552/362 | 100/812 | 79.9 |
| Gallagher et al., 2001             | Cross-sectional | Ireland     | Developed  | Postal questionnaire                                   | 104  | 45.3 (18.9)    | 78/26   | 0/104   | 69.2 |
| Hanley et al., 2006                | Cross-sectional | USA         | Developed  | Postal and telephone questionnaire                     | 255  | 55 (14.3)      | 207/48  | 0/255   | 72   |
| Hanley et al., 2009                | Cross-sectional | USA         | Developed  | Postal questionnaire                                   | 104  | 46.9 (14.1)    | 75/29   | 104/0   | 79   |
| Hnoosh et al., 2014                | Cross-sectional | Iraq        | Developing | Self-reported questionnaire                            | 118  | 32 (12.9)      | 97/21   | 0/181   | 61   |
| Houghton et al., 1994              | Cross-sectional | UK          | Developed  | Postal questionnaire                                   | 176  | 71 (-)         | -       | 0/176   | 78   |
| Kern et al., 2012                  | Cross-sectional | Germany     | Developed  | Postal questionnaire                                   | 537  | 59 (-)         | 382/155 | 24/513  | 74.5 |
| Ketz et al., 2008                  | Cross-sectional | Germany     | Developed  | Self-reported questionnaire                            | 30   | -              | 30/0    | 7/27    | 77   |
| Kooijman et al., 2000 <sup>a</sup> | Cross-sectional | Netherlands | Developed  | Unclear                                                | 72   | 44.2 (35-65)*  | 57/15   | 72/0    | 51   |
| Kooijman et al., 2000 <sup>b</sup> | Cross-sectional | Netherlands | Developed  | Unclear                                                | 27   | 30.5 (9.3-53)* | 13/13   | 27/0    | 0    |
| Larbig et al., 2019                | Cohort          | Germany     | Developed  | Face-to-face interview and self-reported questionnaire | 52   | -              | 41/11   | 2/50    | 75   |
| Morgan et al., 2017                | Cross-sectional | USA         | Developed  | Self-reported and internet questionnaire               | 1296 | 54.4 (13.7)    | 909/387 | 0/1296  | 48.1 |
| Noguchi et al., 2019               | Cross-sectional | Japan       | Developed  | Medical records                                        | 44   | -              | 33/11   | 22/22   | 50   |
| Penna et al., 2018                 | Cohort          | Australia   | Developed  | Medical records                                        | 96   | -              | 74/22   | 0/96    | 52.2 |
| Probstner et al., 2010             | Cross-sectional | Brazil      | Developing | Self-reported questionnaire                            | 75   | 54.4 (18.5)    | 50/25   | 6/69    | 46.7 |
| Rafferty et al., 2015              | Cross-sectional | UK          | Developed  | Self-reported questionnaire                            | 75   | 26.3 (18-42)*  | 74/1    | 0/84    | 85   |

|                                  |                 |         |            |                                                        |     |             |        |        |      |
|----------------------------------|-----------------|---------|------------|--------------------------------------------------------|-----|-------------|--------|--------|------|
| Rahimi et al., 2012              | Cross-sectional | Iran    | Developing | Face-to-face interview                                 | 335 | 42.1 (6.32) | 324/11 | 0/670  | 66.7 |
| Rayegani et al., 2010            | Cross-sectional | Iran    | Developing | Face-to-face interview and self-reported questionnaire | 335 | -           | 327/8  | 0/670  | 64   |
| Rasmus et al., 2017              | Cross-sectional | Poland  | Developed  | Face-to-face interview and self-reported questionnaire | 22  | 61 (11.3)   | 15/7   | 3/22   | 59   |
| Reiber et al., 2010 <sup>a</sup> | Cross-sectional | USA     | Developed  | Postal, internet and telephone questionnaire           | 298 | 60.7 (3.0)  | 298/0  | 78/300 | 72.2 |
| Reiber et al., 2010 <sup>b</sup> | Cross-sectional | USA     | Developed  | Postal, internet and telephone questionnaire           | 283 | 29.3 (5.8)  | 274/9  | 78/273 | 76   |
| Resnik et al., 2019              | Cross-sectional | Canada  | Developed  | Telephone interview                                    | 808 | 63.2 (14.2) | 787/21 | 840/0  | 76.1 |
| Richardson et al., 2007          | Cohort          | UK      | Developed  | Face-to-Face interview                                 | 59  | 63.8 (10.4) | 37/22  | 0/59   | 78.8 |
| Richardson et al., 2015          | Cross-sectional | UK      | Developed  | Face-to-face interview                                 | 89  | 65.5 (11.4) | 64/25  | 0/89   | 63   |
| Schley et al., 2008              | Cross-sectional | Germany | Developed  | Postal and telephone questionnaire                     | 65  | 45 (18-80)* | 60/5   | 65/0   | 44.6 |
| Wartan et al., 1997              | Cross-sectional | UK      | Developed  | unclear                                                | 526 | 73 (-)*     | 526/0  | 99/471 | 62   |
| Yin et al., 2017                 | Cross-sectional | China   | Developed  | Telephone interview                                    | 391 | -           | -      | -      | 29   |

\* Indicates the median age and range

- The number of amputations and males versus females do not add up to the total sample size because some participants had more than one amputation and these data were not provided.

| Authors                | Was the Study's target population a close representation of the national population | Was the sampling frame a true or close representation of the target population | Was some form of random selection used to select the sample, OR, was a census undertaken | Was the likelihood of non-response bias minimal? | Were data collected directly from the subjects? | Was an acceptable case definition used in the study? | Was the study instrument shown to have reliability and validity | Was the same mode of data collection used for all subjects? | Was the length of the shortest prevalence period for the parameter of interest appropriate | Were the Numerator and denominator for the parameter of interest appropriate | Overall risk of bias |
|------------------------|-------------------------------------------------------------------------------------|--------------------------------------------------------------------------------|------------------------------------------------------------------------------------------|--------------------------------------------------|-------------------------------------------------|------------------------------------------------------|-----------------------------------------------------------------|-------------------------------------------------------------|--------------------------------------------------------------------------------------------|------------------------------------------------------------------------------|----------------------|
| Ahmed et al., 2017     | High                                                                                | Low                                                                            | High                                                                                     | High                                             | High                                            | High                                                 | High                                                            | Low                                                         | Low                                                                                        | Low                                                                          | Moderate             |
| Aldington et al., 2014 | High                                                                                | Low                                                                            | Low                                                                                      | High                                             | Low                                             | Low                                                  | High                                                            | Low                                                         | Low                                                                                        | Low                                                                          | Low                  |
| Bekrater et al., 2015  | Low                                                                                 | Low                                                                            | High                                                                                     | High                                             | Low                                             | Low                                                  | High                                                            | High                                                        | Low                                                                                        | Low                                                                          | Moderate             |
| Bin Ayaz et al., 2015  | High                                                                                | High                                                                           | High                                                                                     | High                                             | High                                            | Low                                                  | High                                                            | High                                                        | High                                                                                       | Low                                                                          | High                 |
| Bosmans et al., 2007   | High                                                                                | Low                                                                            | Low                                                                                      | High                                             | Low                                             | High                                                 | High                                                            | Low                                                         | Low                                                                                        | Low                                                                          | Moderate             |

|                                 |      |      |      |      |      |      |      |      |      |     |          |
|---------------------------------|------|------|------|------|------|------|------|------|------|-----|----------|
| Buchanan et al., 1986           | High | High | High | High | Low  | High | High | Low  | High | Low | High     |
| Byrne et al., 2011 <sup>a</sup> | High | High | Low  | High | Low  | High | High | High | High | Low | High     |
| Byrne et al., 2011 <sup>b</sup> | High | High | Low  | High | Low  | High | High | High | High | Low | High     |
| Clark et al., 2013              | High | Low  | High | High | High | High | High | High | High | Low | High     |
| Datta et al., 2004              | High | Low  | High | Low  | High | High | High | Low  | High | Low | Moderate |
| Desmond et al., 2010            | High | Low  | High | High | High | Low  | High | Low  | Low  | Low | Moderate |
| Dijkstra et al., 2002           | High | Low  | High | High | High | Low  | High | Low  | High | Low | Moderate |
| Ehde et al., 2000               | High | Low  | Low  | High | High | Low  | High | Low  | High | Low | Moderate |
| Ephraim et al., 2005            | Low  | Low  | Low  | High | High | Low  | High | Low  | High | Low | Moderate |

|                                    |      |      |      |      |      |      |      |      |      |     |          |
|------------------------------------|------|------|------|------|------|------|------|------|------|-----|----------|
| Gallagher et al., 2001             | High | High | High | High | High | High | High | Low  | High | Low | High     |
| Hanley et al., 2006                | High | Low  | Low  | High | High | Low  | High | High | Low  | Low | Moderate |
| Hanley et al., 2009                | High | High | Low  | High | High | High | High | Low  | High | Low | Moderate |
| Houghton et al., 1994              | High | Low  | High | High | High | High | High | Low  | High | Low | High     |
| Hnoosh et al., 2014                | Low  | High | Low  | High | Low  | Low  | High | Low  | Low  | Low | Low      |
| Kern et al., 2012                  | Low  | Low  | Low  | High | High | High | High | Low  | High | Low | Moderate |
| Ketz et al., 2008                  | High | Low  | High | High | Low  | Low  | High | Low  | High | Low | Moderate |
| Kooijman et al., 2000 <sup>a</sup> | High | Low  | High | Low  | High | High | High | Low  | High | Low | Moderate |
| Kooijman et al., 2000 <sup>b</sup> | High | Low  | High | Low  | High | High | High | Low  | High | Low | Moderate |

|                        |      |      |      |      |      |      |      |      |      |     |          |
|------------------------|------|------|------|------|------|------|------|------|------|-----|----------|
| Larbig et al., 2019    | High | High | High | High | Low  | High | High | Low  | Low  | Low | Moderate |
| Morgan et al., 2017    | Low  | Low  | High | Low  | High | High | High | Low  | Low  | Low | Moderate |
| Noguchi et al., 2019   | High | High | High | High | Low  | Low  | High | Low  | Low  | Low | Moderate |
| Penna et al., 2019     | High | High | Low  | High | High | High | High | Low  | High | Low | High     |
| Probstner et al., 2010 | High | High | High | High | Low  | High | High | High | High | Low | High     |
| Rafferty et al., 2015  | High | High | High | Low  | Low  | High | High | Low  | Low  | Low | Moderate |
| Rahimi et al., 2012    | Low  | Low  | High | Low  | Low  | High | High | Low  | Low  | Low | Low      |
| Rayegani et al., 2010  | High | Low  | High | Low  | Low  | Low  | High | Low  | Low  | Low | Low      |
| Rasmus et al., 2017    | High | High | High | High | Low  | High | High | Low  | High | Low | High     |



|                                  |      |     |      |      |      |      |      |      |      |     |          |
|----------------------------------|------|-----|------|------|------|------|------|------|------|-----|----------|
| Reiber et al., 2010 <sup>a</sup> | High | low | High | High | High | High | High | High | High | Low | High     |
| Reiber et al., 2010 <sup>b</sup> | High | low | High | High | High | High | High | High | High | Low | High     |
| Resnik et al., 2019              | Low  | Low | High | High | Low  | High | High | Low  | High | Low | Moderate |
| Richardson et al., 2007          | High | Low | High | Low  | Low  | High | High | Low  | High | Low | Moderate |
| Richardson et al., 2015          | High | Low | High | High | Low  | High | High | Low  | Low  | Low | Moderate |
| Schley et al., 2008              | High | Low | High | High | High | High | High | High | High | Low | High     |
| Wartan et al., 1997              | High | Low | Low  | Low  | High | High | High | Low  | High | Low | Moderate |
| Yin et al., 2017                 | High | Low | Low  | High | High | High | High | Low  | High | Low | Moderate |

| Author                   | Population                                                   | Outcome | Risk factor(s)               | Measures of association         | Strength of association |
|--------------------------|--------------------------------------------------------------|---------|------------------------------|---------------------------------|-------------------------|
| Ahmed et al.,<br>2017    | Cancer patients who had undergone limb amputations           | PLP     | Post-amputation depression   | 3.86 (1.75-8.53) <sup>‡</sup>   | Strong                  |
|                          |                                                              |         | Pre-amputation pain          | 2.83 (1.38-5.76) <sup>‡</sup>   | Moderate                |
|                          |                                                              |         | Stump pain                   | 31.2 (8.97-108.50) <sup>‡</sup> | Very strong             |
|                          |                                                              |         | Use of prosthesis            | 2.83 (1.19-4.76) <sup>‡</sup>   | Moderate                |
|                          |                                                              |         | Sleep disturbance            | 21.43 (8.28-55.43) <sup>‡</sup> | Very strong             |
| Buchanan et al.,<br>1986 | Amputees who were receiving routine prosthetic services      | PLP     | Age                          | 0.12 (p<0.01) <sup>*</sup>      | Weak                    |
| Desmond et al.,<br>2010  | Members of the British Limbless Ex-Service Men's Association | PLP     | Stump pain                   | 11.17 (p<0.01) <sup>‡</sup>     | Very strong             |
| Dijkstra et al.,<br>2002 | Amputees who were receiving routine prosthetic services      | PLP     | Diabetic cause of amputation | 4 (p<0.001) <sup>‡</sup>        | Strong                  |
|                          |                                                              |         | Proximal site of amputation  | 1.60 (0.038) <sup>‡</sup>       | Moderate                |
|                          |                                                              |         | Lower limb amputation        | 5.60 (p<0.001) <sup>‡</sup>     | Strong                  |
|                          |                                                              |         | Bilateral amputations        | 8.20 (p=0.01) <sup>‡</sup>      | Strong                  |
|                          |                                                              |         | Stump pain                   | 3.90 (p<0.001) <sup>‡</sup>     | Strong                  |
|                          |                                                              |         | Phantom sensations           | 19.50 (p<0.001) <sup>‡</sup>    | Very strong             |
| Ephraim et al.,<br>2005  | Amputees who had contacted the                               | PLP     | Post-amputation depression   | 2 (1.3-3.1) <sup>‡</sup>        | Moderate                |
|                          |                                                              |         |                              | 2.50 (1.3-4.7) <sup>‡</sup>     |                         |

|                                    |                                                                                      |     |                                                                                                                                            |                                                                                                                                                        |                                                          |
|------------------------------------|--------------------------------------------------------------------------------------|-----|--------------------------------------------------------------------------------------------------------------------------------------------|--------------------------------------------------------------------------------------------------------------------------------------------------------|----------------------------------------------------------|
|                                    | Amputee Coalition of America (ACA) between 1998 and 2000                             |     | Lower limb amputation<br>2 or more comorbidities<br>Widow                                                                                  | 2.70 (1.3-5.8) <sup>‡</sup><br>2.70 (1.1-6.5) <sup>‡</sup>                                                                                             | Moderate<br>Moderate<br>Moderate                         |
| Gallagher et al., 2001             | Amputees who were attending the Limb Fitting Clinic.                                 | PLP | Proximal site of amputation<br>Traumatic cause of amputation<br>Sex (male)<br>Other medical problems<br>Lack of pre-amputation counselling | 15.65 (p<0.001) <sup>‡</sup><br>14.60 (p<0.002) <sup>‡</sup><br>3.76 (p<0.05) <sup>‡</sup><br>5.93 (p<0.02) <sup>‡</sup><br>4.74 (p<0.03) <sup>‡</sup> | Very strong<br>Very strong<br>Strong<br>Strong<br>Strong |
| Hanley et al., 2009                | Patients who had undergone upper-limb amputation 6 months or more before recruitment | PLP | Use of prosthesis                                                                                                                          | 4.23 (p<0.05) <sup>¶</sup>                                                                                                                             | Moderate                                                 |
| Hanley et al., 2006                | Patients who had undergone lower limb amputation                                     | PLP | Pre-amputation pain<br>Stump pain                                                                                                          | 0.48 (p<0.01) <sup>§</sup><br>0.53 (p<0.0001) <sup>§</sup>                                                                                             | Weak<br>Weak                                             |
| Kooijman et al., 2000 <sup>a</sup> | Amputees using upper limb prosthesis                                                 | PLP | Phantom sensations<br>Stump pain                                                                                                           | 11.30 (p=0.001) <sup>†</sup><br>1.90 (p=0.015) <sup>†</sup>                                                                                            | Very strong<br>Weak                                      |
| Larbig et al., 2019                | Patients who had undergone upper or lower limb amputations                           | PLP | Pre-amputation depression<br>Pre-amputation pain<br>Stump pain                                                                             | 2.05 (p<0.05) <sup>§</sup><br>4.22 (p<0.01) <sup>§</sup><br>3.90 (p<0.01) <sup>§</sup>                                                                 | Moderate<br>Moderate<br>Moderate                         |

|                         |                                                                                             |     |                                                                                                                  |                                                                                                            |                                                  |
|-------------------------|---------------------------------------------------------------------------------------------|-----|------------------------------------------------------------------------------------------------------------------|------------------------------------------------------------------------------------------------------------|--------------------------------------------------|
| Noguchi et al., 2019    | Patients who had undergone upper or lower limb amputations                                  | PLP | Diabetic cause of amputation<br>Pre-amputation pain                                                              | 2.24 (p=0.032)‡<br>6.36 (p=0.024)‡                                                                         | Moderate<br>Strong                               |
| Razmus et al., 2017     | Occupants of the nursing home, and clients of the Public Institute of Orthopaedic Equipment | PLP | Phantom sensations                                                                                               | 4.94 (p<0.05)§                                                                                             | Strong                                           |
| Richardson et al., 2007 | Patients who had undergone amputation of the lower limb due to peripheral vascular disease. | PLP | Stump pain<br>Increased ability to move the phantom limb.<br>Praying/hoping<br>Catastrophizing<br>Passive coping | 7.03 (1.34-36.82)‡<br>8.31 (1.54-44.79)‡<br>2.86 (1.68-13.18)‡<br>3.28 (1.71-14.91)‡<br>4.60 (6.50-25.00)‡ | Strong<br>Strong<br>Moderate<br>Strong<br>Strong |
| Wartan et al., 1997     | Traumatic amputees                                                                          | PLP | Phantom sensations                                                                                               | 107.30 (p<0.0001)§                                                                                         | Strong                                           |
| Yin et al., 2017        | Amputees who underwent limb amputations at a tertiary hospital                              | PLP | Pre-amputation pain<br>Post-amputation epidural analgesia                                                        | 10.40 (p=0.002)‡<br>4.90 (p=0.008)‡                                                                        | Very strong<br>Strong                            |

¥ Point-biserial correlation analysis; ¶ Pearson's univariate correlation test; § Chi-squared; † Relative risk; ‡ Odds ratio

| Author                 | Population                                                                              | Outcome | Risk factor(s)                                                                                                  | Measures of association                                                                                                                                                                            |
|------------------------|-----------------------------------------------------------------------------------------|---------|-----------------------------------------------------------------------------------------------------------------|----------------------------------------------------------------------------------------------------------------------------------------------------------------------------------------------------|
| Ahmed et al., 2017     | Cancer patients who had undergone limb amputations                                      | PLP     | Sex<br>smoking<br>Regional Anaesthesia<br>Post-amputation analgesia<br>Perioperative gabapentin<br>Radiotherapy | 0.65 (0.31-1.40) <sup>‡</sup><br>1.40 (0.71-2.78) <sup>‡</sup><br>0.99 (0.68-1.54) <sup>‡</sup><br>1.41 (0.94-2.10) <sup>‡</sup><br>0.75 (0.76-1.51) <sup>‡</sup><br>1.33 (0.66-2.66) <sup>‡</sup> |
| Dijkstra et al., 2002  | Amputees who were receiving routine prosthetic services                                 | PLP     | Sex<br>Prosthesis use (>8 hours per day)                                                                        | — (p=0.73) <sup>‡</sup><br>— (p<0.13) <sup>‡</sup>                                                                                                                                                 |
| Ephraim et al., 2005   | Amputees who had contacted the Amputee Coalition of America (ACA) between 1998 and 2000 | PLP     | Sex<br>Age<br>Traumatic cause of amputation<br>Years since amputation                                           | 1.4 (0.90-2.20) <sup>‡</sup><br>1.1 (0.60–1.80) <sup>‡</sup><br>0.9 (0.50–1.70) <sup>‡</sup><br>1.0 (0.60–1.90) <sup>‡</sup>                                                                       |
| Gallagher et al., 2001 | Amputees who were attending the Limb Fitting Clinic.                                    | PLP     | Post-amputation support                                                                                         | — (—)                                                                                                                                                                                              |
| Hanley et al., 2009    | Patients who had undergone upper-limb amputation 6 months or more before recruitment    | PLP     | Age<br>Sex                                                                                                      | 3.78 (p=0.83) <sup>¶</sup><br>0.78 (p=0.99) <sup>¶</sup>                                                                                                                                           |
| Kooijman et al.,       | Amputees using upper                                                                    | PLP     | Sex                                                                                                             | — (p=0.21) <sup>†</sup>                                                                                                                                                                            |

|                      |                                                            |     |                                                                                                                      |                                                                                                                 |
|----------------------|------------------------------------------------------------|-----|----------------------------------------------------------------------------------------------------------------------|-----------------------------------------------------------------------------------------------------------------|
| 2000                 | limb prosthesis                                            |     | Amputation of the dominant limb<br>Pre-amputation pain<br>Upper limb amputation<br>Prosthesis use (>8 hours per day) | — (p=0.59) <sup>†</sup><br>— (p=0.59) <sup>†</sup><br>— (p=0.08) <sup>†</sup><br>— (p=0.06) <sup>†</sup>        |
| Noguchi et al., 2019 | Patients who had undergone upper or lower limb amputations | PLP | Sex<br>Age<br>Traumatic cause of amputation<br>Increased hospital-stay                                               | 0.78 (p=0.73) <sup>‡</sup><br>— (p=0.65) <sup>‡</sup><br>2.941 (p=0.22) <sup>‡</sup><br>— (p=0.26) <sup>‡</sup> |
| Wartan et al., 1997  | Traumatic amputees                                         | PLP | Pre-amputation pain                                                                                                  | 10.6 (p<0.30) <sup>§</sup>                                                                                      |

¥ Point-biserial correlation analysis; ¶ Pearson's univariate correlation test; § Chi-squared; † Relative risk; ‡ Odds ratio; — missing figure
